# Supplementary material for: Extent and determinants of catastrophic health expenditure for tuberculosis care in Chongqing municipality, China: a cross-sectional study
Source: PubMed Central journal article supplement — BMJ Open. 2019 Apr 11;9(4):e026638. doi: 10.1136/bmjopen-2018-026638 (PMC6500361; doi:10.1136/bmjopen-2018-026638), 2019-04-11
Supplement: bmjopen-2018-026638.draft_revisions.pdf [file bmjopen-2018-026638.draft_revisions.pdf]

# BMJ Open

BMJ Open is committed to open peer review. As part of this commitment we make the peer review history of every article we publish publicly available.

When an article is published we post the peer reviewers' comments and the authors' responses online. We also post the versions of the paper that were used during peer review. These are the versions that the peer review comments apply to.

The versions of the paper that follow are the versions that were submitted during the peer review process. They are not the versions of record or the final published versions. They should not be cited or distributed as the published version of this manuscript.

BMJ Open is an open access journal and the full, final, typeset and author-corrected version of record of the manuscript is available on our site with no access controls, subscription charges or pay-per-view fees (<http://bmjopen.bmj.com>).

If you have any questions on BMJ Open's open peer review process please email [info.bmjopen@bmj.com](mailto:info.bmjopen@bmj.com)

# BMJ Open

## The extent and determinants of catastrophic health expenditure for tuberculosis care in southwest of China: a cross-sectional study

|                               |                                                                                                                                                                                                                                                                                                                                                                                                                                                                                                                                                                                                                                                                  |
|-------------------------------|------------------------------------------------------------------------------------------------------------------------------------------------------------------------------------------------------------------------------------------------------------------------------------------------------------------------------------------------------------------------------------------------------------------------------------------------------------------------------------------------------------------------------------------------------------------------------------------------------------------------------------------------------------------|
| Journal:                      | <i>BMJ Open</i>                                                                                                                                                                                                                                                                                                                                                                                                                                                                                                                                                                                                                                                  |
| Manuscript ID                 | bmjopen-2018-026638                                                                                                                                                                                                                                                                                                                                                                                                                                                                                                                                                                                                                                              |
| Article Type:                 | Research                                                                                                                                                                                                                                                                                                                                                                                                                                                                                                                                                                                                                                                         |
| Date Submitted by the Author: | 14-Sep-2018                                                                                                                                                                                                                                                                                                                                                                                                                                                                                                                                                                                                                                                      |
| Complete List of Authors:     | Duan, Weixia; Chongqing Occupational Diseases Prevention Hospital, Department of laboratory medicine;<br>Zhang, Wen; Chongqing Institute of Tuberculosis Prevention and Treatment,<br>Wu, Chengguo; Chongqing Institute of Tuberculosis Prevention and Treatment,<br>Wang, Qingya; Chongqing Institute of Tuberculosis Prevention and Treatment,<br>Yu, Ya; Chongqing Institute of Tuberculosis Prevention and Treatment,<br>Lin, Hui; The Third Military Medical University, Department of Epidemiology<br>Liu, Ying; Chongqing Institute of Tuberculosis Prevention and Treatment,<br>Hu, Daiyu; Chongqing Institute of Tuberculosis Prevention and Treatment, |
| Keywords:                     | Tuberculosis < INFECTIOUS DISEASES, Catastrophic health expenditure, Patient delay, Diagnostic delay                                                                                                                                                                                                                                                                                                                                                                                                                                                                                                                                                             |
|                               |                                                                                                                                                                                                                                                                                                                                                                                                                                                                                                                                                                                                                                                                  |

SCHOLARONE™  
Manuscripts

Only

**Title page****The extent and determinants of catastrophic health expenditure for tuberculosis care in southwest of China: a cross-sectional study****Running title: The extent and determinants of CHE for TB care**

Weixia Duan<sup>1,2</sup>, Wen Zhang<sup>2</sup>, Chengguo Wu<sup>2</sup>, Qingya Wang<sup>2</sup>, Ya Yu<sup>2</sup>, Hui Lin<sup>3</sup>, Ying Liu<sup>2\*</sup> and Daiyu Hu<sup>2\*</sup>

**Affiliations:**

<sup>1</sup>Department of laboratory medicine, Chongqing Occupational Diseases Prevention Hospital, No. 305 Nancheng Road, Nan'an District, Chongqing 400060, China.

<sup>2</sup>Chongqing Institute of Tuberculosis Prevention and Treatment, No. 71 Longteng Road, Xiejiawan Street, Jiulongpo District, Chongqing 400050, China.

<sup>3</sup>Department of Epidemiology, College of Preventive Medicine, The Third Military Medical University, Gaotanyan Road, Shapingba District, Chongqing 400038, China.

**\* Corresponding author:**

Professor Ying Liu and Daiyu Hu

Chongqing Institute of Tuberculosis Prevention and Treatment, No. 71 Longteng Road, Xiejiawan Street, Jiulongpo District, Chongqing 400050, China.

Phone:+86-023-86133600, Fax:+86-023-86133600

Email: Ying Liu([910981960@qq.com](mailto:910981960@qq.com)), Daiyu Hu ([hukaixiou@263.net](mailto:hukaixiou@263.net))

## ABSTRACT

**Objective:** To investigate the extent and determinants of catastrophic health expenditure (CHE) for tuberculosis (TB) care in representative southwest region of China.

**Design:** A cross-sectional study

**Setting:** Four counties of Chongqing municipality, China

**Participants:** 1199 active pulmonary TB patients beyond 16 years and without mental disorders were consecutively recruited in the four counties' designated TB medical institutions.

**Outcome measures** Socio-demographic and clinical characteristics of the study participants, direct medical costs, incidence and intensity of CHE for TB care were described. Univariable and multivariable logistic regression analyses were performed to assess the determinants of CHE.

**Results** The incidence of CHE was 52.8%. Out-of-pocket payments were 93% of the total costs for TB care. Compared with patients without delay, the incidence and intensity of CHE were greater in patients who had patient delay or diagnostic delay. Incurring CHE was independently associated with patient delay (adjusted odds ratio [aOR], 1.359; 95% confidence interval (CI), 1.062–1.740), diagnostic delay (aOR, 1.449; 95% CI, 1.131–1.857), being male (aOR, 1.511; 95% CI, 1.149–1.987), inhabitant (aOR, 1.477; 95% CI, 1.107–1.971) and high educational level (aOR, 0.611; 95% CI, 0.505–0.739).

**Conclusion** The findings might be considered as baseline data about the extent of

1  
2  
3 catastrophic costs that TB-related households faced in southwest of China. Our  
4  
5 findings will provide valuable information for policymakers to take fine-tuned  
6  
7 interventions to decrease catastrophic costs for TB-affected households.  
8  
9

10 **Keywords:** Tuberculosis, Catastrophic health expenditure, Patient delay, Diagnostic  
11  
12 delay  
13  
14

### 15 **Strengths and limitations of this study**

- 16  
17  
18 1. The study first provides the baseline data about TB-related households facing  
19  
20 catastrophic costs and the determinants of CHE for TB care in southwest of China.  
21  
22  
23 2. The study highlights the importance of early care seeking and diagnosis of TB.  
24  
25  
26 3. Our findings will provide valuable information for policymakers to take fine-tuned  
27  
28 interventions to decrease catastrophic costs for TB-affected households.  
29  
30  
31 4. Due to some data were collected based on self-reporting, which may be subjected to  
32  
33 a recall bias.  
34  
35  
36 5. The non-medical costs and indirect costs were not taken into account, which may  
37  
38 underestimate the extent of CHE for TB care and should be considered in the future  
39  
40 study.  
41  
42  
43  
44  
45  
46  
47  
48  
49  
50  
51  
52  
53  
54  
55  
56  
57  
58  
59  
60

## INTRODUCTION

Tuberculosis (TB) is the first leading cause of death among communicable diseases worldwide. China ranks third among the countries in the world with the heaviest TB burden.<sup>1</sup> Poverty is not only strongly associated with TB incidence, but also a cause and a devastating outcome of TB in China.<sup>2</sup> Therefore, TB is not only a serious infectious disease but also a major public health problem worldwide. “End TB strategy,” a plan announced by the World Health Organization (WHO) to end the global TB epidemic, aims to reduce TB death rate by 95% and cut new cases by 90% between 2015 and 2035, and to ensure that no affected families will face catastrophic costs due to TB by 2020.<sup>3</sup> The last target is so urgent and important to ascertain the progress of universal health coverage and social protection. However, the projected 2015 baseline is not yet available.<sup>3</sup>

To reduce the economic burden on TB patients, a “free TB service policy” was implemented in many continents.<sup>5-7</sup> In China, the “free TB service policy” includes free X-ray examination and free sputum smear test for patients once with suspected TB at first visit, free anti-TB drugs (6 months for new patients and 8 months if previously treated), three free sputum smear tests, and one free X-ray test during anti-TB treatment. Although the policy has been implemented for 25 years in China, TB patients still suffer from the high costs of TB treatment, which often forces their families into catastrophe and poverty.<sup>8-12</sup>

Catastrophic health expenditure (CHE) is a measure of financial risk protection and is often incurred by households who have to pay out of pocket (OOP) for health

1  
2  
3 services. Thus, the household may have to sacrifice the consumption of other goods  
4  
5 and services necessary for their well-being.<sup>4</sup> A series of studies reported that the  
6  
7 incidence of CHE for TB care in China ranges between 46.7% and 66.8%, which is  
8  
9 higher than the incidence of other illnesses despite the patients' access to free TB  
10  
11 treatment.<sup>10-12</sup> Additionally, households with members having TB are approximately  
12  
13 1.8 times more likely to experience CHE than those without.<sup>13</sup> Therefore, it is essential  
14  
15 to reduce the economic burden of TB patients and save their families from CHE.  
16  
17  
18  
19

20  
21 According to a few studies conducted in China, Nigeria, and Benin, the factors  
22  
23 determining CHE for TB care include age, sex, number of family members, urban  
24  
25 residence, educational level, being a breadwinner, job loss, health insurance status,  
26  
27 poor households, adverse pre-diagnosis stage (i.e., patient delay over 1 month and  
28  
29 seeking of informal care), treatment at a private facility, ratio of patient income to total  
30  
31 household income, hospitalization, and previous of TB treatment.<sup>11 14-16</sup> However, the  
32  
33 factors associated with CHE among TB patients remain not well elucidated.  
34  
35  
36  
37

38 As an economic and industrial hub of southwest region of China, Chongqing  
39  
40 municipality has experienced rapid economic development. The TB epidemic is high  
41  
42 in southwest China and Chongqing ranks in the top 10 among the highest TB burden  
43  
44 provinces in China. The TB notification rate of Chongqing in 2015 has declined to 70.8  
45  
46 cases per 100,000 population from the peak of 106 cases per 100,000 in 2005. Recent  
47  
48 five years, approximately 20,000 patients were reported with TB in Chongqing,  
49  
50 making up 2.5% of all notified TB cases in China.<sup>17</sup> Consideration the high TB burden  
51  
52 and great challenges in controlling TB, as well as no baseline data about the TB-related  
53  
54  
55  
56  
57  
58  
59  
60

1  
2  
3 families facing catastrophic costs in southwest of China, we conducted a  
4  
5  
6 cross-sectional study to investigate the extent and determinants of CHE for TB care,  
7  
8  
9 taking Chongqing as an example.  
10  
11  
12  
13  
14  
15  
16  
17  
18  
19  
20  
21  
22  
23  
24  
25  
26  
27  
28  
29  
30  
31  
32  
33  
34  
35  
36  
37  
38  
39  
40  
41  
42  
43  
44  
45  
46  
47  
48  
49  
50  
51  
52  
53  
54  
55  
56  
57  
58  
59  
60



## METHODS

### Study sites and participants

There are 39 counties in Chongqing. This cross-sectional study was conducted in four counties of Chongqing from March 2013 to August 2014. According to the Chongqing Statistical Yearbook 2015, the real GDP per capita was 47850 RMB. Urban population accounts for 59.6% of the total population in 2014. The four counties with similar levels of economic development and similar human geographical environment as the study sites. These four counties are among the middle-income counties in southwest region of China, have both villages and cities, and are in the process of urbanization.

From March to December in 2013, all the registered active pulmonary TB (PTB) patients excluding those aged below 16 years or with mental disorders were recruited consecutively in the designated TB medical institutes of the four counties. Totally, 1290 PTB patients were qualified, of whom 61 refused to participate due to poor clinical conditions and 30 questionnaires were not completed. Thus, a total of 1199 patients were included in the study. All participants had access to free TB treatment and were prospectively followed throughout the treatment period.

### Data collection

All data were collected in these four counties' designated TB medical institutes. The study was based on a well-structured questionnaire and patients' medical records. All participants at the local TB-designated medical institutes were interviewed face to face by a trained TB staff using the questionnaire. The following data were obtained:

covered personal information, socioeconomic information (age, sex, residence, occupation, education, marital status, number of family members, medical insurance status, household income, etc.), and history of disease (forms of TB, date of first onset of suspected TB symptoms, date of first visit to any health provider, date of PTB diagnosis, and direct medical costs for TB care). Clinic information and exact date of TB diagnosis were checked against the patients' medical records. A 6-month or 8-month treatment regimen was recommended by the WHO. The treatment costs were collected every month. Out-of-pocket (OOP) payments and reimbursements of the direct medical costs for TB care in different periods of services (pre-diagnosis, diagnosis, and treatment) were collected per individual and checked according to the invoices. All costs were indicated in Ren Min Bi (RMB).

### Definitions

**Pulmonary TB** was diagnosed based on the pathological, clinical, and radiological findings, and confirmed through bacteriological and histological examinations, which were strictly performed according to the Chinese Diagnostic criteria for PTB (WS-288-2008).<sup>18</sup>

**Patient delay** is determined as a time interval from the first onset of TB symptoms to the first visit to any health provider; if the time interval lasts for more than 14 days, it is considered as a "delay".<sup>19</sup>

**Diagnostic delay** is defined as a time interval between a patient's first visit to any health provider and the final diagnosis as TB; if the time interval lasts for more than 14

1  
2  
3 days, it is considered as a “delay”.<sup>19</sup>  
4  
5

6 **Pre-diagnosis** is the period from the onset of TB symptoms to first visit to a local  
7 designated TB medical institutions. **The period of diagnosis** is from the first visit to a  
8 local designated TB medical institution to the diagnosis of TB. **The period of**  
9 **treatment** is the full course of TB treatment.  
10  
11  
12  
13

14 **Direct medical costs** are composed of consultation fees, laboratory tests, X-rays,  
15 medical tests, and drugs during the period of pre-diagnosis, diagnosis, and treatment.  
16  
17  
18

19 **OOP payments** are regarded as the direct medical costs paid by patients themselves.  
20  
21

22 **Catastrophic health expenditure** is defined as OOP expenditure for healthcare that  
23 exceeds a specified proportion of household income, often set at a threshold of 10% or  
24 40% for the proportion of OOP in total household income or household capacity to pay,  
25 respectively.<sup>14</sup> The 40% for the proportion of OOP in household capacity to pay is  
26 recommended by the WHO and is widely used. The 10% for the proportion of OOP in  
27 total household income is also used in many studies. In this study, the OOP payments  
28 of direct medical costs for TB care exceeding the 10% of household annual income are  
29 defined as catastrophic.  
30  
31  
32  
33  
34  
35  
36  
37  
38  
39  
40  
41  
42  
43  
44

#### 45 **Measuring the incidence and intensity of catastrophic health expenditure**

46

47 CHE is usually assessed by incidence and intensity. Head count (HC) is used to  
48 measure the incidence of CHE, while mean gap (MG) and mean positive gap (MPG)  
49 are used to reflect the intensity of CHE. HC means the percentage of households whose  
50 OOP payments equal or exceed 10% of their annual income to the total number of  
51  
52  
53  
54  
55  
56  
57  
58  
59  
60

1  
2  
3 households. MG is the average amount by which OOP payments, as a proportion of  
4  
5 household annual income, exceeds the threshold. MPG is equal to  $MG/HC$ , the excess  
6  
7 expenditure per household experiencing CHE. The methods used in measuring HC,  
8  
9 MG, and MPG are based on the previous study.<sup>20</sup>  
10  
11  
12  
13  
14  
15

### 16 **Statistical analysis**

17  
18 Data were double entered and checked using EPI Data Version 3. Data analysis was  
19  
20 performed using Statistical Package for the Social Sciences (SPSS) Version 18.0  
21  
22 (SPSS Inc. Chicago, IL, USA). Continuous variables were presented as means, or  
23  
24 medians and interquartile (IQR) ranges, while categorical variables were presented as  
25  
26 numbers and percentages (%). Comparisons among groups were analyzed using the  
27  
28 Pearson's chi-square test. Odds ratios (ORs) and their 95% confidence intervals (CIs)  
29  
30 were estimated. All variables that showed association with outcome variable ( $p < 0.05$ )  
31  
32 in the univariable analysis were included in the multivariable model. A multivariate  
33  
34 logistic regression analysis, using a backward elimination method, was performed to  
35  
36 assess the determinants of CHE in a multivariate model. A two sided p-value of  $< 0.05$   
37  
38 was considered statistically significant.  
39  
40  
41  
42  
43  
44  
45  
46  
47

### 48 **Ethics approval**

49  
50 The study was approved by the Ethical Committee of the Chongqing Institute of  
51  
52 Tuberculosis Prevention and Treatment, Chongqing, China. A written informed  
53  
54 consent was obtained from each participant prior to inclusion in the survey.  
55  
56  
57  
58  
59  
60

1  
2  
3  
4  
5  
6  
7  
8  
9  
10  
11  
12  
13  
14  
15  
16  
17  
18  
19  
20  
21  
22  
23  
24  
25  
26  
27  
28  
29  
30  
31  
32  
33  
34  
35  
36  
37  
38  
39  
40  
41  
42  
43  
44  
45  
46  
47  
48  
49  
50  
51  
52  
53  
54  
55  
56  
57  
58  
59  
60

**Patient and public involvement**

No applicable for this study.

For peer review only

## RESULTS

### Patient characteristics

The characteristics of these pulmonary TB patients are summarized in Table 1. A total of 1199 PTB patients were enrolled in the study. The proportion of men to women involved in this study is 2.3:1. More than three-quarters of patients were in their labor age (16–59 years), and the average age of the patients were 43.9 years, with a median age of 44 years. Approximately 30% of patients were migrants. Two-thirds of patients were married and received at least junior high school education. The patients included in this study were either unemployed, employed, or peasant. Approximately three-quarters of the households had one to three family members. In majority, 89.2% of the patients had medical insurance. Only 15.9% of patients had been hospitalized in the intensive period. Approximately three-quarters of patients were smear negative. Of the total participants, 53.0% (635/1199) and 43.0% (516/1199) experienced patient and diagnostic delay, respectively. Patients' average annual household income was 42,200 RMB, with a median (IQR) of 35,000 RMB (20,000–56,000 RMB).

### Direct medical costs for TB in different periods of medical treatment

The OOP costs and medical insurance reimbursement in the pre-diagnosis, diagnosis, and treatment period are presented in Table 2. Costs in the pre-diagnosis period were all paid by OOP, accounting for nearly half of the total cost. Excluding the fees covered by free TB treatment, the average diagnosis cost was 528 RMB, which could not be reimbursed by medical insurance, while the average treatment cost was 3107 RMB, of

1  
2  
3 which approximately 85% was paid by OOP. Overall, the average medical cost of a TB  
4 patient was 7,000 RMB, with a median of 4,085 RMB and 93% of which were paid by  
5  
6 OOP. Average annual household OOP payment was 6,518 RMB (a median of 3,789  
7  
8 RMB), which accounts for 15.4% of the mean household annual income.  
9  
10  
11  
12  
13  
14  
15

### 16 **Incidence and intensity of CHE**

17  
18 Table 3 shows that 52.8% (633/1199) of all TB-related households experienced CHE.  
19  
20 On average, healthcare payments for TB were 18.1% higher than the threshold value  
21  
22 (10%). For households experiencing CHE, the mean positive gap was 34.2% higher  
23  
24 than the threshold. The incidence of CHE in patients experiencing patient delay or  
25  
26 diagnostic delay was 11% or 9.7% more than those not experiencing patient delay or  
27  
28 diagnostic delay, respectively. The intensity measure was also greater for the group of  
29  
30 experiencing patient delay or diagnostic delay than the group without delay.  
31  
32  
33  
34  
35  
36  
37

### 38 **Determinants of CHE**

39  
40 In Table 4, the impacts of different variables on the incidence of CHE are compared  
41  
42 among various patients or households using a Pearson's chi-square test. There are  
43  
44 many factors associated with CHE, including patient delay, diagnostic delay, sex, age,  
45  
46 resident status, marital status, educational level, occupation, medical insurance status,  
47  
48 and hospitalization.  
49  
50

51  
52 Logistic regression analysis showed that the independent determinants of CHE  
53  
54 include patient delay (adjusted odds ratio [aOR], 1.359; 95% CI, 1.062–1.740),  
55  
56  
57  
58  
59  
60

1  
2  
3 diagnostic delay (aOR, 1.449; 95% CI, 1.131–1.857), sex (aOR, 1.511; 95% CI,  
4 1.149–1.987), resident status (aOR, 1.477; 95% CI, 1.107–1.971), and educational  
5 level (aOR, 0.611; 95% CI, 0.505–0.739). That is to say, patients who have  
6 experienced patient delay or diagnostic delay have greater risks of CHE. The  
7 probability of incurring CHE increases if the patient is male, a permanent resident, or  
8 has a low educational background (Table 5).  
9  
10  
11  
12  
13  
14  
15  
16  
17  
18  
19  
20  
21  
22  
23  
24  
25  
26  
27  
28  
29  
30  
31  
32  
33  
34  
35  
36  
37  
38  
39  
40  
41  
42  
43  
44  
45  
46  
47  
48  
49  
50  
51  
52  
53  
54  
55  
56  
57  
58  
59  
60



## DISCUSSION

This study revealed that the incidence of CHE for TB care is 52.8% after reimbursement. It is lower than the reported rates of 66.8%, 66% and 78.1% using the same CHE measurement methods in other cities of China, Nigeria, and Benin, respectively.<sup>10 14 15</sup> However, compared with the incidence of CHE incurred by common disease or non-communicable chronic disease in China and other countries, CHE incidence is still higher in TB-related households.<sup>4 21 22</sup> Recently, WHO changes the definition of "catastrophic costs due to TB", which is the total [direct and indirect] costs exceeding 20% of annual household income.<sup>23</sup> Although the threshold (10%) we set is lower than the recent definition, it may also be valuable to present the proportion of TB-affected patients (and their households) facing catastrophic costs if direct costs alone are counted.<sup>23</sup> A previous study in China demonstrated that non-medical costs relating to TB treatment are a serious financial burden for many TB patients.<sup>24</sup> Since the non-medical costs and indirect costs were not taken into account in the current study, the incidence of patients incurring catastrophic costs in this study population may be underestimated. Further studies are needed to evaluate the catastrophic costs accurately.

Although all patients in this study have access to free TB treatment and the majority of them have medical insurance, there was still a considerable amount of money spent before diagnosis and during treatment and a low ratio of reimbursement result in very high OOP payment. There may be three reasons to explain the phenomena: (i) many associated health-care costs are not covered in the free TB policy,

1  
2  
3  
4 for example, payment for drugs of ancillary and liver protection, and extra diagnostic  
5 tests.<sup>26 12</sup> (ii) Driven by profits, doctors may prescribe additional drugs and tests.<sup>25</sup> (iii)  
6  
7  
8 The costs before diagnosis are usually not reimbursed and the reimbursement level for  
9  
10 outpatient TB treatment after diagnosis is very low due to a limited outpatient quota in  
11  
12 China.<sup>9</sup> Furthermore, the patients' average annual household income is lower than the  
13  
14 the real GDP per capita in 2014 in Chongqing, which reconfirmed that TB inequitably  
15  
16 affects poor people.<sup>26</sup> This is another reason why the incidence of CHE is so high in  
17  
18 the study.  
19  
20  
21  
22

23 In contrast with the previous study conducted in China,<sup>11</sup> the present study found  
24  
25 that age, number of family members, health insurance status, and hospitalization are  
26  
27 not the major determinants of CHE. It may be due to the different study settings and  
28  
29 different participants in the two studies. Being male and having low educational level  
30  
31 are independent determinants of CHE, which is consistent with a study carried out in  
32  
33 Nigeria.<sup>14</sup> Men are the breadwinner of a family and patients with low education may  
34  
35 have low income. Surprisingly, the migrant population is less likely to experience CHE.  
36  
37  
38 The reason need to be further investigated.  
39  
40  
41  
42

43 In this study, we found that patient delay and diagnostic delay are very important  
44  
45 determinants of CHE. Therefore, patients who encountered patient or diagnostic delay  
46  
47 are more likely to incur CHE than those without delay. Prolonged delays in TB  
48  
49 diagnosis are still prevailing problems in many countries in many low- and  
50  
51 middle-income countries, such as Southern, Ethiopia , Zambia , Tanzania ,  
52  
53 Mozambique, Indonesia and so on.<sup>27-33</sup> Delay in diagnosis have a huge impact on TB  
54  
55  
56  
57  
58  
59  
60

1  
2  
3 transmission in the community, aggravating the severity and mortality and resulting in  
4  
5 an unfavorable treatment outcome, as well as increasing patient's expenses.<sup>17 34-38</sup>  
6  
7  
8 Therefore, it is vital to take measures to shorten the delay in diagnosis.  
9

10  
11 Patient delay may be related to the fact that patients do not take minor symptoms  
12 seriously in its early stage and will pay greater attention to it until symptoms become  
13 more severe.<sup>9 39</sup> In addition, many sociodemographic and economic factors contribute  
14 to patient delay.<sup>18 40</sup> Therefore, we should adopt comprehensive measures to facilitate  
15 patients to seek care early, such as strengthening TB health education to the public and  
16 adopting a precise poverty alleviation to increase the income of poverty-stricken  
17 patients. Early diagnosis is difficult due to the great percentage of asymptomatic PTB  
18 patients and non-availability of rapid, accurate, and cost-effective tests in many  
19 settings.<sup>2 41</sup> In this study, only one-quarter of patients has been confirmed  
20 bacteriological and mainly based on traditional methods. In fact, rapid molecular  
21 methods were not frequently used in Chongqing in 2013. Smear microscopy is rapid  
22 and cheap but with low sensitivity, whereas sputum culture is gold standard but labor  
23 intensive and time consuming. Various molecular TB diagnosis methods such as  
24 GeneXpert, line probe assay, and loop-mediated isothermal amplification are rapid and  
25 accurate but expensive and not covered by public medical insurance in China.<sup>42-44</sup>  
26  
27 Methods based on immunology and protein biomarkers are rapid but limited due to  
28 their low accuracy.<sup>45 46</sup> Considering the limitations of diagnostic methods, more rapid,  
29 accurate, and affordable methods are urgently needed to shorten the time of diagnosis.  
30  
31  
32  
33  
34  
35  
36  
37  
38  
39  
40  
41  
42  
43  
44  
45  
46  
47  
48  
49  
50  
51  
52  
53

54  
55 This study has some other limitations. Firstly, due to some data were collected  
56  
57  
58  
59  
60

1  
2  
3  
4 based on self-reporting, which may be subjected to a recall bias. Secondly, the data in  
5  
6 this study were collected four years ago and the per capita income has increased from  
7  
8 2014 to 2017. However, China's free TB service policy has not changed in recent years  
9  
10 and TB inequitably affects poor people. Therefore, the CHE remains a problem for TB  
11  
12 now in China. The results of this study still have a guiding significance in future  
13  
14 practice. Furthermore, based on the results of this study we have taken some effective  
15  
16 measures to shorten the delay in diagnosis, including strengthen TB health education to  
17  
18 the public, adopt a precise poverty alleviation policy and promote rapid diagnostic tests  
19  
20 for detection of TB.  
21  
22  
23  
24  
25  
26  
27

## 28 **CONCLUSION**

29  
30 The results indicate that the incidence and intensity of CHE for TB care are high,  
31  
32 which provide baseline data of TB-related households facing CHE in southwest of  
33  
34 China. Male patients, inhabitants, those with low educational level, and those who  
35  
36 experience patient delay and diagnostic delay are more likely to incur CHE. Although  
37  
38 the study was completed at four counties and results cannot be generalized to all TB  
39  
40 patients in China, it still provides valuable information for policymakers to take  
41  
42 fine-tuned interventions to decrease catastrophic costs for TB-affected households.  
43  
44  
45  
46  
47 Multi-center studies should be implemented in the future study.  
48  
49  
50  
51  
52  
53  
54  
55  
56  
57  
58  
59  
60

1  
2  
3  
4 **Acknowledgments** We thank the participants who have generously devoted their  
5  
6 time and the staff in the study sites where this work has been conducted for their  
7  
8 support in making this work done. Great thanks to professor Bradley Chen from  
9  
10 National Yang-Ming University of Taiwan and professor Chen-Yuan Chiang from  
11  
12 International Union Against Tuberculosis and Lung Disease for their professional  
13  
14 suggestions in manuscript writing.  
15  
16

17  
18 **Contributors** YL, DH and WD conceived and designed the study. WZ, YY, YL and  
19  
20 QW collected data. WD, HL and DH performed the statistical analyses and wrote the  
21  
22 manuscript. All authors read and approved the final version of the manuscript.  
23  
24

25  
26 **Funding** This work was supported by the research funding from Chongqing  
27  
28 Municipal Health Bureau (No.2012-1-087 and 2017MSXM124).  
29

30  
31 **Competing interests** None  
32

33  
34 **Patient consent** Obtained  
35

36  
37 **Ethics approval** The Ethical Committee of Chongqing Institute of Tuberculosis  
38  
39 Prevention and Treatment, Chongqing, China.  
40

41  
42 **Provenance and peer review** Not commissioned; externally peer reviewed  
43

44  
45 **Data sharing statement** No additional data are available  
46  
47  
48  
49  
50  
51  
52  
53  
54  
55  
56  
57  
58  
59  
60

## References

1. World Health Organization. Global tuberculosis report 2016. World Health Organization: Geneva, Switzerland; WHO/HTM/TB/2016:13.
2. Jackson S, Sleight AC, Wang GJ, *et al.* Poverty and the economic effects of TB in rural China. *Int J Tuberc Lung Dis* 2006;10(10):1104-10.
3. World Health Organization. The end TB strategy. Geneva, Switzerland; 2014.
4. Xu K, Evans DB, Kawabata K, *et al.* Household catastrophic health expenditure: a multicountry analysis. *Lancet* 2003;362(9378):111-7.
5. Holtgrave DR, Crosby RA. Social determinants of tuberculosis case rates in the United States. *Am J Prev Med* 2004;26(2):159-62.
6. Long Q, Smith H, Zhang T, *et al.* Patient medical costs for tuberculosis treatment and impact on adherence in China: a systematic review. *BMC Public Health* 2011;11:393.
7. Mauch V, Bonsu F, Gyapong M, *et al.* Free tuberculosis diagnosis and treatment are not enough: patient cost evidence from three continents. *Int J Tuberc Lung Dis* 2013;17(3):381-7.
8. Meng Q, Li R, Cheng G, *et al.* Provision and financial burden of TB services in a financially decentralized system: a case study from Shandong, China. *Int J Health Plann Manage* 2004;19 Suppl 1:S45-62.
9. Zhang T, Tang S, Jun G, *et al.* Persistent problems of access to appropriate, affordable TB services in rural China: experiences of different socio-economic groups. *BMC Public Health* 2007;7:19.
10. Zhou C, Long Q, Chen J, *et al.* The effect of NCMS on catastrophic health expenditure and impoverishment from tuberculosis care in China. *Int J Equity Health* 2016;15(1):172.
11. Zhou C, Long Q, Chen J, *et al.* Factors that determine catastrophic expenditure for tuberculosis care: a patient survey in China. *Infect Dis Poverty* 2016;5:6.
12. Liu Q, Smith H, Wang Y, *et al.* Tuberculosis patient expenditure on drugs and tests in subsidised, public services in China: a descriptive study. *Trop Med Int Health* 2010;15(1):26-32.
13. Li Y, Wu Q, Xu L, Legge D, *et al.* Factors affecting catastrophic health expenditure and impoverishment from medical expenses in China: policy implications of universal health insurance. *Bull World Health Organ* 2012;90(9):664-71.
14. Ukwaja KN, Alobu I, Abimbola S, *et al.* Household catastrophic payments for tuberculosis care in Nigeria: incidence, determinants, and policy implications for universal health coverage. *Infect Dis Poverty* 2013;2(1):21.
15. Laokri S, Dramaix-Wilmet M, Kassa F, *et al.* Assessing the economic burden of illness for tuberculosis patients in Benin: determinants and consequences of catastrophic health expenditures and inequities. *Trop Med Int Health* 2014;19(10):1249-58.
16. Fuady A, Houweling TAJ, Mansyur M, *et al.* Catastrophic total costs in tuberculosis-affected households and their determinants since Indonesia's implementation of universal health coverage. *Infect Dis Poverty* 2018;7(1): 3.
17. Wu B, Yu Y, Xie W, *et al.* Epidemiology of tuberculosis in Chongqing, China: a secular trend from 1992 to 2015. *Sci Rep* 2017; 7(1):7832.
18. WS-288-2008. Diagnostic criteria for pulmonary tuberculosis. *Ministry of health of the People's Republic of China*, 2008.
19. Li Y, Ehiri J, Tang S, *et al.* Factors associated with patient, and diagnostic delays in Chinese

- 1  
2  
3 TB patients: a systematic review and meta-analysis. *BMC Med* 2013;11:156.
- 4 20. Wagstaff A, van Doorslaer E. Catastrophe and impoverishment in paying for health care: with  
5 applications to Vietnam 1993-1998. *Health Econ* 2003;12(11):921-34.
- 6  
7 21. Jiang C, Ma J, Zhang X, *et al.* Measuring financial protection for health in families with  
8 chronic conditions in Rural China. *BMC Public Health* 2012;12:988.
- 9  
10 22. Sun Q, Liu X, Meng Q, *et al.* Evaluating the financial protection of patients with chronic  
11 disease by health insurance in rural China. *Int J Equity Health* 2009;8:42.
- 12  
13 23. Tuberculosis patient cost surveys: a hand book. Geneva: World Health Organization; 2017.  
14 Licence: CC BY-NC-SA 3.0 IGO.
- 15  
16 24. Li Q, Jiang W, Wang Q, *et al.* Non-medical financial burden in tuberculosis care: a  
17 cross-sectional survey in rural China. *Infect Dis Poverty* 2016;5:5.
- 18  
19 25. Zhan, S., Wang, L., Yin, A., and Blas, E. Revenue-driven in TB control--three cases in China.  
20 *Int J Health Plann Manage* 2004; 19 Suppl 1, S63-78.
- 21  
22 26. Rocha C, Montoya R, Zevallos K, *et al.* The Innovative socioeconomic interventions against  
23 TB (ISIAT) project – an operational assessment. *Int J Tuberc Lung Dis* 2011; 15: S50–57
- 24  
25 27. Storla DG, Yimer S, Bjune GA. A systematic review of delay in the diagnosis and treatment of  
26 tuberculosis. *BMC Public Health* 2008;8:15.
- 27  
28 28. Lin Y, Enarson DA, Chiang CY, *et al.* Patient delay in the diagnosis and treatment of  
29 tuberculosis in China: findings of case detection projects. *Public Health Action* 2015; 5(1):  
30 65-9.
- 31  
32 29. Fuge TG, Bawore SG, Solomon DW, *et al.* Patient delay in seeking tuberculosis diagnosis and  
33 associated factors in Hadiya Zone, Southern Ethiopia. *BMC Res Notes* 2018;11(1): 115.
- 34  
35 30. Needham DM, Foster SD, Tomlinson G, *et al.* Socio-economic, gender and health services  
36 factors affecting diagnostic delay for tuberculosis patients in urban Zambia. *Trop Med Int*  
37 *Health* 2001;6(4): 256-9.
- 38  
39 31. Said K, Hella J, Mhalu G, *et al.* Diagnostic delay and associated factors among patients with  
40 pulmonary tuberculosis in Dar es Salaam, Tanzania. *Infect Dis Poverty* 2017; 6(1): 64.
- 41  
42 32. Saifodine A, Gudo PS, Sidat M, *et al.* Patient and health system delay among patients with  
43 pulmonary tuberculosis in Beira city, Mozambique. *BMC Public Health* 2013; 13: 559.
- 44  
45 33. Lock WA, Ahmad RA, Ruitter RA, *et al.* Patient delay determinants for patients with suspected  
46 tuberculosis in Yogyakarta province, Indonesia. *Trop Med Int Health* 2011; 16(12): 1501-10.
- 47  
48 34. Harris TG, Sullivan Meissner J, Proops D. Delay in diagnosis leading to nosocomial  
49 transmission of tuberculosis at a New York City health care facility. *Am J Infect Control*  
50 2013;41(2):155-60.
- 51  
52 35. Mahato RK, Laohasiriwong W, Vaeteewootacharn K, *et al.* Major Delays in the Diagnosis  
53 and Management of Tuberculosis Patients in Nepal. *J Clin Diagn Res* 2015;9(10):LC05-9.
- 54  
55 36. Kuznetsov VN, Grjibovski AM, Mariandyshev AO, *et al.* Two vicious circles contributing to  
56 a diagnostic delay for tuberculosis patients in Arkhangelsk. *Emerg Health Threats J*  
57 2014;7:24909.
- 58  
59 37. Lui G, Wong RY, Li F, *et al.* High mortality in adults hospitalized for active tuberculosis in a  
60 low HIV prevalence setting. *PLoS One* 2014;9(3):e92077.
38. Gebreegzabher SB, Bjune GA, Yimer SA. Total Delay Is Associated with Unfavorable  
Treatment Outcome among Pulmonary Tuberculosis Patients in West Gojjam Zone,  
Northwest Ethiopia: A Prospective Cohort Study. *PLoS One* 2016;11(7):e0159579.

- 1
- 2
- 3 39. Lambert ML, Van der Stuyft P. Delays to tuberculosis treatment: shall we continue to blame
- 4 the victim? *Trop Med Int Health* 2005;10(10):945-6.
- 5
- 6 40. Osei E, Akweongo P, Binka F. Factors associated with DELAY in diagnosis among
- 7 tuberculosis patients in Hohoe Municipality, Ghana. *BMC Public Health* 2015;15:721.
- 8
- 9 41. Xu W, Lu W, Zhou Y, *et al.* Adherence to anti-tuberculosis treatment among pulmonary
- 10 tuberculosis patients: a qualitative and quantitative study. *BMC Health Serv Res* 2009;9:169.
- 11
- 12 42. Bhirud P, Joshi A, Hirani N, *et al.* Rapid laboratory diagnosis of pulmonary tuberculosis. *Int J*
- 13 *Mycobacteriol* 2017;6(3):296-301.
- 14
- 15 43. Yan L, Zhang Q, Xiao H. Clinical diagnostic value of simultaneous amplification and testing
- 16 for the diagnosis of sputum-scarce pulmonary tuberculosis. *BMC Infect Dis* 2017;17(1):545.
- 17
- 18 44. Steingart KR, Schiller I, Horne DJ, *et al.* Xpert(R) MTB/RIF assay for pulmonary
- 19 tuberculosis and rifampicin resistance in adults. *Cochrane Database Syst Rev* 2014;1:CD0
- 20 09593.
- 21
- 22 45. Wayengera M, Mwebaza I, Welishe J, *et al.* Immuno-diagnosis of Mycobacterium
- 23 tuberculosis in sputum, and reduction of timelines for its positive cultures to within 3 h by
- 24 pathogen-specific thymidylate kinase expression assays. *BMC Res Notes* 2017;10(1):368.
- 25
- 26 46. Singh A, Kumar Gupta A, *et al.* Evaluation of 5 Novel protein biomarkers for the rapid
- 27 diagnosis of pulmonary and extra-pulmonary tuberculosis: preliminary results. *Sci Rep*
- 28 2017;7:44121.
- 29
- 30
- 31
- 32
- 33
- 34
- 35
- 36
- 37
- 38
- 39
- 40
- 41
- 42
- 43
- 44
- 45
- 46
- 47
- 48
- 49
- 50
- 51
- 52
- 53
- 54
- 55
- 56
- 57
- 58
- 59
- 60



**Table 1 Socio-demographic and clinical characteristics of the study participants (n=1199).**

| Variables                 | Patients No. | Percent (%) |
|---------------------------|--------------|-------------|
| <b>Sex</b>                |              |             |
| Male                      | 839          | 70.0        |
| Female                    | 360          | 30.0        |
| <b>Age</b>                |              |             |
| ≤40                       | 532          | 44.4        |
| 41-59                     | 402          | 33.5        |
| ≥60                       | 265          | 22.1        |
| <b>Residential status</b> |              |             |
| Inhabitant                | 848          | 70.7        |
| Migrant                   | 351          | 29.3        |
| <b>Marital status</b>     |              |             |
| Single                    | 340          | 28.4        |
| Married                   | 795          | 66.3        |
| Divorced/widow            | 64           | 5.3         |
| <b>Educational level</b>  |              |             |
| Primary or below          | 382          | 31.9        |
| Junior high               | 356          | 29.7        |
| High school and above     | 461          | 38.4        |
| <b>Occupation</b>         |              |             |
| Unemployed                | 302          | 25.2        |
| Employed                  | 327          | 27.3        |
| Peasant                   | 353          | 29.4        |
| Student                   | 96           | 8.0         |
| Retiree                   | 121          | 10.1        |
| <b>Family size</b>        |              |             |
| 1~3                       | 887          | 74.0        |
| 4~8                       | 312          | 26.0        |
| <b>Medical insurance</b>  |              |             |
| Yes                       | 1069         | 89.2        |

|                                     |                       |      |
|-------------------------------------|-----------------------|------|
| No                                  | 130                   | 10.8 |
| <b>Hospitalization</b>              |                       |      |
| Yes                                 | 191                   | 15.9 |
| No                                  | 1008                  | 84.1 |
| <b>Forms of TB</b>                  |                       |      |
| Smear-negative PTB                  | 892                   | 74.4 |
| Smear-positive PTB                  | 307                   | 25.6 |
| <b>Patient delay</b>                |                       |      |
| Yes                                 | 635                   | 53.0 |
| No                                  | 564                   | 47.0 |
| <b>Diagnostic delay</b>             |                       |      |
| Yes                                 | 516                   | 43.0 |
| No                                  | 683                   | 57.0 |
| <b>Household annual income(RMB)</b> |                       |      |
| Mean                                | 42,200                |      |
| Median (IQR)                        | 35,000(20,000-56,000) |      |

---

Note: IQR represents interquartile range. TB represents tuberculosis.

**Table 2 Direct medical costs for TB care in different periods of services (n=1199). RMB**

| Costs in different periods (services) | Out of pockets |                 | Medical insurance reimbursement |             | Total |                 |
|---------------------------------------|----------------|-----------------|---------------------------------|-------------|-------|-----------------|
|                                       | Mean           | Median(IQR)     | Mean                            | Median(IQR) | Mean  | Median(IQR)     |
| Pre-diagnosis                         | 3282           | 750(250-3000)   | 0                               | 0           | 3282  | 750(250-3000)   |
| Diagnosis*                            | 528            | 157(121-250)    | 0                               | 0           | 528   | 157(121-250)    |
| Treatment #                           | 2638           | 1792(834-3050)  | 482                             | 0(0-501)    | 3107  | 1966(1000-3723) |
| Total                                 | 6518           | 3789(2106-6645) | 482                             | 0(0-501)    | 7000  | 4085(2222-7371) |

Note: The expenses excludes the costs of the free-TB policy reduction and exemption. \*The expenses excluded the cost of one time free chest X-ray and sputum smear examination. #The expenses excluded anti-TB drugs (6 months for new patients, 8 months if previously treated ), three times sputum smear tests and one time X-ray test during anti-TB treatment.

**Table 3 Incidence and intensity of CHE for TB care stratified by patient and diagnostic delay.**

| Catastrophic health expenditure | Patient delay |      | Diagnostic delay |      | All (n=1199) |
|---------------------------------|---------------|------|------------------|------|--------------|
|                                 | Yes           | No   | Yes              | No   |              |
| Head count (%)                  | 58.0          | 47.0 | 58.3             | 48.6 | 52.8         |
| Mean gap (%)                    | 21.1          | 14.6 | 19.3             | 17.2 | 18.1         |
| Mean positive gap (%)           | 36.5          | 31.1 | 33.0             | 35.3 | 34.2         |

**Table 4 Single factor analysis of catastrophic health expenditure in patients.**

|                         | Variables  | Experiencing CHE (n,%) | Not experiencing CHE (n,%) | OR (95% CI)        | Chi-square | <i>P-value</i> |
|-------------------------|------------|------------------------|----------------------------|--------------------|------------|----------------|
| <b>Patient delay</b>    | No         | 265 (47.0)             | 299(53.0)                  | 1.0                |            |                |
|                         | Yes        | 368(58.0)              | 267(42.0)                  | 1.555(1.238-1.954) | 14.415     | 0.000          |
| <b>Diagnostic delay</b> | No         | 332(48.6)              | 351(51.4)                  | 1.0                |            |                |
|                         | Yes        | 301(58.3)              | 215(41.7)                  | 1.480(1.175-1.864) | 11.153     | 0.001          |
| <b>Sex</b>              | Female     | 151(41.9)              | 209(58.1)                  | 1.0                |            |                |
|                         | Male       | 482(57.4)              | 357(42.6)                  | 1.869(1.455-2.400) | 24.300     | 0.000          |
| <b>Age</b>              | ≤40        | 200(37.6)              | 332(62.4)                  | 1.0                |            |                |
|                         | 41-59      | 242(60.2)              | 160(39.8)                  | 2.511(1.925-3.275) | 46.936     | 0.000          |
|                         | ≥60        | 191(72.1)              | 74(27.9)                   | 4.285(3.109-5.904) | 84.156     | 0.000          |
| <b>Resident status</b>  | Migrant    | 129(36.8)              | 222(63.2)                  | 1.0                |            |                |
|                         | Inhabitant | 504(59.4)              | 344(40.6)                  | 2.521(1.951-3.259) | 51.246     | 0.000          |
| <b>Marital status</b>   | Single     | 133(39.1)              | 207(60.9)                  | 1.0                |            |                |
|                         | Married    | 450(56.7)              | 344(43.3)                  | 2.036(1.571-2.638) | 29.377     | 0.000          |

1  
2  
3  
4  
5  
6  
7  
8  
9  
10  
11  
12  
13  
14  
15  
16  
17  
18  
19  
20  
21  
22  
23  
24  
25  
26  
27  
28  
29  
30  
31  
32  
33  
34  
35  
36  
37  
38  
39  
40  
41  
42  
43  
44  
45  
46  
47

|                                 |                       |           |           |                    |         |       |
|---------------------------------|-----------------------|-----------|-----------|--------------------|---------|-------|
|                                 | Divorced/widow        | 50(76.9)  | 15(23.1)  | 5.188(2.800-9.613) | 31.488  | 0.000 |
| <b>Educational level</b>        | Primary or below      | 277(72.5) | 105(27.5) | 1.0                |         |       |
|                                 | Junior high           | 190(53.4) | 166(46.6) | 0.434(0.319-0.589) | 29.058  | 0.000 |
|                                 | High school and above | 166(36.0) | 295(64.0) | 0.213(0.159-0.286) | 111.600 | 0.000 |
| <b>Occupation</b>               | Unemployed            | 139(46.0) | 163(54.0) | 1.0                |         |       |
|                                 | Employed              | 128(39.1) | 199(60.9) | 0.754(0.549-1.036) | 3.044   | 0.081 |
|                                 | Peasant               | 261(73.9) | 92(26.1)  | 3.327(2.396-4.519) | 53.331  | 0.000 |
|                                 | Student               | 37(38.5)  | 59(61.5)  | 0.735(0.460-1.176) | 1.654   | 0.198 |
|                                 | Retiree               | 68(56.2)  | 53(43.8)  | 1.505(0.984-2.300) | 3.577   | 0.059 |
| <b>Family size</b>              | 1~3                   | 479(54.0) | 408(46.0) | 1.0                |         |       |
|                                 | 4~8                   | 154(49.4) | 158(50.6) | 0.830(0.641-1.075) | 1.997   | 0.158 |
| <b>Medical insurance status</b> | No                    | 47(36.2)  | 83(63.8)  | 1.0                |         |       |
|                                 | Yes                   | 586(54.8) | 483(45.2) | 2.143(1.469-3.125) | 16.200  | 0.000 |
| <b>Hospitalization</b>          | No                    | 517(51.3) | 491(48.7) | 1.0                |         |       |
|                                 | Yes                   | 116(60.7) | 75(39.3)  | 1.469(1.071-2.014) | 5.746   | 0.017 |

|                    |                    |           |           |                    |       |       |
|--------------------|--------------------|-----------|-----------|--------------------|-------|-------|
| <b>Forms of TB</b> | Smear-negative PTB | 480(53.8) | 412(46.2) | 1.0                |       |       |
|                    | Smear-positive PTB | 153(49.8) | 154(50.2) | 0.853(0.658-1.105) | 1.448 | 0.229 |

Note: PTB, pulmonary tuberculosis. OR, odds ratio. 95% CI, 95% confidence interval for the odds ratio.

**Table 5 Independent determinants of CHE for TB care using logistic regression model.**

| <b>Variables</b>   | <b>B</b> | <b>Standard error</b> | <b>Wald</b> | <b>P-value</b> | <b>Odds ratio(95% CI)</b> |
|--------------------|----------|-----------------------|-------------|----------------|---------------------------|
| Patient delay      | 0.307    | 0.126                 | 5.943       | 0.015          | 1.359(1.062-1.740)        |
| Diagnostic delay   | 0.371    | 0.127                 | 8.585       | 0.003          | 1.449(1.131-1.857)        |
| Sex                | 0.413    | 0.14                  | 8.703       | 0.003          | 1.511(1.149-1.987)        |
| Residential status | 0.39     | 0.147                 | 7.033       | 0.008          | 1.477(1.107-1.971)        |
| Educational level  | -0.493   | 0.097                 | 25.779      | $P<0.001$      | 0.611(0.505-0.739)        |
| Constant           | -0.905   | 0.306                 | 8.753       | 0.003          |                           |

Note: The variables that showed association with patient delay ( $p<0.05$ ) in the univariable analysis were included in the multivariable model. The results showed association with CHE ( $p<0.05$ ) were presented here. OR, odds ratio. 95% CI, 95% confidence interval for the odds ratio.

1  
2  
3  
4  
5  
6  
7  
8  
9  
10  
11  
12  
13  
14  
15  
16  
17  
18  
19  
20  
21  
22  
23  
24  
25  
26  
27  
28  
29  
30  
31  
32  
33  
34  
35  
36  
37  
38  
39  
40  
41  
42  
43  
44  
45  
46  
47  
48  
49  
50  
51  
52  
53  
54  
55  
56  
57  
58  
59  
60

1

For peer review only

# BMJ Open

## The extent and determinants of catastrophic health expenditure for tuberculosis care in southwest of China: a cross-sectional study

|                                 |                                                                                                                                                                                                                                                                                                                                                                                                                                                                                                                                                                                                                                                                                           |
|---------------------------------|-------------------------------------------------------------------------------------------------------------------------------------------------------------------------------------------------------------------------------------------------------------------------------------------------------------------------------------------------------------------------------------------------------------------------------------------------------------------------------------------------------------------------------------------------------------------------------------------------------------------------------------------------------------------------------------------|
| Journal:                        | <i>BMJ Open</i>                                                                                                                                                                                                                                                                                                                                                                                                                                                                                                                                                                                                                                                                           |
| Manuscript ID                   | bmjopen-2018-026638.R1                                                                                                                                                                                                                                                                                                                                                                                                                                                                                                                                                                                                                                                                    |
| Article Type:                   | Research                                                                                                                                                                                                                                                                                                                                                                                                                                                                                                                                                                                                                                                                                  |
| Date Submitted by the Author:   | 10-Jan-2019                                                                                                                                                                                                                                                                                                                                                                                                                                                                                                                                                                                                                                                                               |
| Complete List of Authors:       | Duan, Weixia; Chongqing Institute of Tuberculosis Prevention and Treatment; Chongqing Occupational Diseases Prevention Hospital<br>Zhang, Wen; Chongqing Institute of Tuberculosis Prevention and Treatment<br>Wu, Chengguo; Chongqing Institute of Tuberculosis Prevention and Treatment,<br>Wang, Qingya; Chongqing Institute of Tuberculosis Prevention and Treatment,<br>Yu, Ya; Chongqing Institute of Tuberculosis Prevention and Treatment,<br>Lin, Hui; The Third Military Medical University, Department of Epidemiology<br>Liu, Ying; Chongqing Institute of Tuberculosis Prevention and Treatment,<br>Hu, Daiyu; Chongqing Institute of Tuberculosis Prevention and Treatment, |
| <b>Primary Subject Heading</b>: | Infectious diseases                                                                                                                                                                                                                                                                                                                                                                                                                                                                                                                                                                                                                                                                       |
| Secondary Subject Heading:      | Epidemiology, Public health                                                                                                                                                                                                                                                                                                                                                                                                                                                                                                                                                                                                                                                               |
| Keywords:                       | Tuberculosis < INFECTIOUS DISEASES, Catastrophic health expenditure, Patient delay, Diagnostic delay, health insurance                                                                                                                                                                                                                                                                                                                                                                                                                                                                                                                                                                    |
|                                 |                                                                                                                                                                                                                                                                                                                                                                                                                                                                                                                                                                                                                                                                                           |

SCHOLARONE™  
Manuscripts



1  
2  
3  
4 **Title page**  
5  
6

7 **The extent and determinants of catastrophic health expenditure in tuberculosis**  
8 **care in Chongqing Municipality, China: cross-sectional study**  
9

10  
11  
12 **Running title: The extent and determinants of CHE for TB care**  
13

14 Weixia Duan<sup>1,2</sup>, Wen Zhang<sup>1</sup>, Chengguo Wu<sup>1</sup>, Qingya Wang<sup>1</sup>, Ya Yu<sup>1</sup>, Hui Lin<sup>3</sup>,  
15 Ying Liu<sup>1\*</sup> and Daiyu Hu<sup>1\*</sup>  
16  
17  
18  
19  
20  
21

22 **Affiliations:**  
23

24  
25 <sup>1</sup>Chongqing Institute of Tuberculosis Prevention and Treatment, No. 71 Longteng  
26 Road, Xiejiawan Street, Jiulongpo District, Chongqing 400050, China.  
27  
28

29  
30 <sup>2</sup>Department of laboratory medicine, Chongqing Occupational Diseases Prevention  
31 Hospital, No. 305 Nancheng Road, Nan'an District, Chongqing 400060, China.  
32  
33

34  
35 <sup>3</sup>Department of Epidemiology, College of Preventive Medicine, The Third Military  
36 Medical University, Gaotanyan Road, Shapingba District, Chongqing 400038, China.  
37  
38

39 **\* Corresponding author:**  
40

41  
42 Professor Ying Liu and Daiyu Hu  
43

44  
45 Chongqing Institute of Tuberculosis Prevention and Treatment, No. 71 Longteng  
46 Road, Xiejiawan Street, Jiulongpo District, Chongqing 400050, China.  
47  
48

49 Phone:+86-023-86133600, Fax:+86-023-86133600  
50

51  
52 Email:Ying Liu([910981960@qq.com](mailto:910981960@qq.com)), Daiyu Hu ([hukaixiou@263.net](mailto:hukaixiou@263.net))  
53  
54  
55  
56  
57  
58  
59  
60

## ABSTRACT

**Objective:** To investigate the extent and associations of patient /diagnostic delay and other potential factors with catastrophic health expenditure (CHE) for tuberculosis (TB) care in Chongqing Municipality, China.

**Design:** A cross-sectional study

**Setting:** Four counties of Chongqing municipality, China

**Participants:** A total of 1199 active pulmonary TB patients beyond 16 years and without mental disorders were consecutively recruited in the four counties' designated TB medical institutions.

**Outcome measures** The incidence and intensity of CHE for TB care were described. The association between patients' "social-demographic and clinical characteristics such as patient delay, diagnostic delay, forms of TB, health insurance status and hospitalization" and CHE were analyzed using univariate and multivariate logistic regression.

**Results** The incidence of CHE was 52.8% and out-of-pocket payments were 93% of the total costs for TB care. Compared with patients without delay, the incidence and intensity of CHE were higher in patients who had patient delay or diagnostic delay. Patients who experienced patient delay or diagnostic delay, who was a male, elderly ( $\geq 60$  years), an inhabitant, a peasant, divorced/widow, NCMS membership had greater risks of incurring CHE for TB care. Having a higher educational level appeared to be a protective factor. However, hospitalization was not associated with CHE after controlling for other variables.

**Conclusion** The incidence and intensity of CHE for TB care are high, which provides baseline data about catastrophic costs that TB-related households faced in Chongqing of China. Variety of determinants of CHE implicate that it is essential to take effective measures to promote early seeking care and early diagnosis, improve

1  
2  
3  
4 the actual reimbursement rates of health insurance, especially for outpatients, and  
5 need more fine-tuned interventions such as precise poverty alleviation to reduce  
6 catastrophic costs of the vulnerable population.  
7  
8

9  
10 **Keywords:** Tuberculosis, Catastrophic health expenditure, Patient delay, Diagnostic  
11 delay, Health insurance  
12  
13

### 14 **Strengths and limitations of this study**

- 15  
16  
17  
18 1. The study provides new data about TB-related households facing catastrophic  
19 costs and the determinants of CHE for TB care in China.  
20  
21  
22 2. The study highlights the importance of early care seeking and diagnosis of TB.  
23  
24  
25 3. Our findings will provide valuable information for policymakers to take fine-tuned  
26 interventions to decrease catastrophic costs for vulnerable TB-affected households.  
27  
28  
29 4. Due to some data were collected based on self-reporting, which may be subjected  
30 to recall bias.  
31  
32  
33 5. The non-medical costs and indirect costs were not taken into account, which may  
34 underestimate the extent of CHE for TB care and should be considered in the future  
35 study.  
36  
37  
38  
39  
40  
41  
42  
43  
44  
45  
46  
47  
48  
49  
50  
51  
52  
53  
54  
55  
56  
57  
58  
59  
60

## INTRODUCTION

Tuberculosis (TB) is one of the top 10 causes of death and the leading cause of a single infectious disease (above HIV/AIDS) worldwide. In 2017, about 10.0 million people developed TB disease and 1.6 million deaths caused by TB globally. China has the second largest burden of TB in the world, accounting for 9% of all cases.<sup>1</sup> Poverty is not only strongly associated with TB incidence, but also a cause and a devastating outcome of TB.<sup>2</sup> Therefore, TB is not only a serious infectious disease but also a severe public health problem worldwide. “End TB strategy,” a plan announced by the World Health Organization (WHO) to end the global TB epidemic, aims to reduce TB death rate by 95% and cut new cases by 90% between 2015 and 2035, and no affected families face catastrophic costs due to TB by 2020.<sup>3</sup> However, the projected 2015 baseline is not yet available.<sup>3</sup> Achieving zero TB-induced catastrophic costs for households is too great to realize because the financial burden for TB patients is extremely high in low-income, middle-income and high-income countries.<sup>4-7</sup> For instance, the mean treatment costs per drug-sensitive (DS-TB) TB patient are \$39 to \$858 in Africa, \$149 to \$724 in China and €3,427 to €10,282 in the EU.<sup>4 6 8</sup>

1  
2  
3  
4 Catastrophic health expenditure (CHE) is a widely used index to calculate the  
5 burden of medical costs upon households at a national level and is often incurred by  
6 households who have to pay out-of-pocket (OOP) for health services.<sup>9 10</sup> Thus, the  
7 family may have to sacrifice the consumption of other goods and services necessary  
8 for their well-being.<sup>10</sup> There are various definitions of CHE and no one gold standard  
9 for measuring it. <sup>11 12</sup> WHO has defined CHE as OOP payment for direct health care  
10 spending exceeds 40% of a household's capacity, <sup>10</sup> while many studies defined CHE  
11 as OOP payment for health-care that exceeds a specified proportion of annual  
12 household income which often set the threshold at 10%-25%. <sup>11 13 14</sup> According to the  
13 End TB Strategy, it is now recommended to measure catastrophic costs incurred  
14 when the total costs exceed 20% of the annual household income.<sup>15</sup> Eradicating  
15 catastrophic costs for TB-affected families is essential to ascertain the progress of  
16 universal health coverage and social protection. However, the data about CHE for TB  
17 care are limited.

18  
19  
20  
21  
22  
23  
24  
25  
26  
27  
28  
29  
30  
31  
32 A recent systematic review indicated that approximately a third of households with  
33 a TB patient experienced TB-associated catastrophic costs.<sup>5</sup> For instance, the  
34 incidence of CHE for TB was 32.4% in Puducherry of India, 78.1% in Benin, and  
35 44% in Nigeria. <sup>11 16</sup> In China, more than two-thirds of TB-related households  
36 experienced CHE overall, and 46.7 % of the households still experienced CHE after  
37 reimbursement by NCMS in rural areas.<sup>17 18</sup> Additionally, households with members  
38 having TB are approximately 1.8 times more likely to suffer CHE than those  
39 without.<sup>19</sup> Therefore, it is essential to reduce the economic burden of TB patients and  
40 save their families from CHE.

41  
42  
43  
44  
45  
46  
47  
48  
49  
50 To reduce the economic burden on TB patients, a "free TB service policy" has  
51 been implemented in many countries.<sup>8 20 21</sup> Although the policy has been conducted  
52 for many years, TB patients still suffer from the high costs of TB treatment, which  
53 often forces their families into catastrophe and poverty in low- and middle-income  
54 countries, such as in China, India, Peru, Ethiopia, and Tajikistan. <sup>16-18 22 23</sup> In China,  
55 the "free TB service policy" includes free X-ray examination and free sputum smear  
56  
57  
58  
59  
60

1  
2  
3  
4 test for patients once with suspected TB at first visit, free first-line anti-TB drugs (6  
5 months for new patients and 8 months if previously treated), three free sputum smear  
6 tests, and one free X-ray test during anti-TB treatment.<sup>18</sup> Also, there are three  
7 essential government-led complementary health insurances to cover some extra  
8 expenditures beyond the “free-TB service policy” in China, including the New  
9 Cooperative Medical Scheme (NCMS) for rural farmers, the Medical Insurance for  
10 Urban Residents scheme (MIUR) and the Medical Insurance for Urban Employees  
11 (MIUE).<sup>18</sup> Health insurance is the least for rural farmers followed by that for local  
12 urban residents, while it for urban employees is the most. However, the financial  
13 protection remains insufficient though China has dramatically expanded health  
14 insurance coverage.<sup>19</sup>

25  
26 According to a few studies conducted in China, Nigeria, Indonesia and Benin, the  
27 factors determining CHE for TB care include age, sex, number of family members,  
28 urban residence, educational level, being a breadwinner, job loss, health insurance  
29 status, poor households, adverse pre-diagnosis stage, treatment at a private facility,  
30 ratio of patient income to total household income, hospitalization, and previous of TB  
31 treatment.<sup>11 13 17 24</sup> However, the factors associated with CHE among TB patients  
32 remain not well elucidated. Considering fact that delay in TB diagnosis was not only  
33 a significant challenge of TB control and prevention programs in low- and middle-  
34 income settings but also was an vital risk factor increases the risk of transmission and  
35 economic costs to patients and communities at large,<sup>25 26</sup> we planned to explore the  
36 associations between the patient and diagnostic delay and CHE for TB care. Also, the  
37 extent of CHE and other risk factors related to CHE are investigated as well.  
38 Consequently, a cross-sectional study was performed in Chongqing municipality,  
39 which was an economic and industrial hub of the southwest region of China with a  
40 heavy burden of TB.  
41  
42  
43  
44  
45  
46  
47  
48  
49  
50  
51  
52  
53  
54  
55  
56  
57  
58  
59  
60

## METHODS

### Study sites and participants

This cross-sectional study was conducted in four counties of Chongqing from March 2013 to August 2014. The TB epidemic was high in Chongqing, which ranked in the top 10 among the most upper TB burden provinces in China. The TB notification rate of Chongqing in 2015 had declined to 70.8 cases per 100,000 populations from the peak of 106 cases per 100,000 in 2005, but still above the average TB incidence of China. Recent years, approximately 20,000 patients were reported with TB in Chongqing, making up 2.5% of all notified TB cases in China.<sup>27</sup> There are 39 districts/counties in Chongqing. According to the Chongqing Statistical Yearbook 2015, the real GDP per capita was 47850 RMB. Urban population accounts for 59.6% of the total population. The four counties with similar levels of economic development and similar human geographical environment were selected as the study sites. These four counties are among the middle-income counties in Chongqing, have both villages and cities, and are in the process of urbanization. In Chongqing, the reimbursement ratio in different counties was different. The reimbursement ratio of medical expenses was 0-60% by MIUE, 0-50% by MIUR and 0-45% by NCMS for outpatients and 65% by MIUE, 35% by MIUR and 35% by NCMS for inpatients in Chongqing.

From March to December in 2013, all registered active pulmonary TB (PTB) patients excluding those aged below 16 years or with mental disorders were recruited consecutively in the designated TB medical institutes of the four counties. Because extrapulmonary TB, tuberculous pleuritis, drug-resistant pulmonary TB and PTB patients not registered in counties' designated TB medical institutes were not covered by the free TB service policy during the period of research, only registered active pulmonary TB were included. Totally, 1290 PTB patients were qualified, of who 61 refused to participate due to poor clinical conditions and 30 questionnaires were not completed. Thus, a total of 1199 patients were included in the study. All participants

1  
2  
3  
4 had access to free TB treatment and were prospectively followed throughout the  
5  
6 treatment period.  
7

### 8 **Data collection** 9

10  
11 All data were collected in these four counties' designated TB medical institutes. The  
12  
13 study was based on a well-structured questionnaire and patients' medical records. All  
14  
15 participants at the local TB-designated medical institutes were interviewed face to  
16  
17 face by a trained TB staff using the questionnaire. The following data were obtained:  
18  
19 covered personal information, socioeconomic information (age, sex, residence,  
20  
21 occupation, education, marital status, number of family members, household income,  
22  
23 etc.), and history of disease (forms of TB, date of first onset of suspected TB  
24  
25 symptoms, date of first visit to any health provider, date of PTB diagnosis, and direct  
26  
27 medical costs for TB care). Clinic information (patient delay, diagnostic delay, forms  
28  
29 of TB, health insurance status and hospitalization) and exact date of TB diagnosis  
30  
31 were checked against the patients' medical records. A 6-month or 8-month treatment  
32  
33 regimen was recommended by the WHO. The follow-up survey was conducted with  
34  
35 TB patients till completion of the treatment. The treatment costs were collected every  
36  
37 month by the trained TB staff. The staff interviewed each participant and then  
38  
39 checked invoices or financial accounting systems to ensure accuracy. OOP payments  
40  
41 and reimbursements of the direct medical costs in different periods of services  
42  
43 (pre-diagnosis, diagnosis, and treatment) were collected per individual and checked  
44  
45 invoices or financial accounting systems as well. All costs were indicated in Ren Min  
46  
47 Bi (RMB).  
48

### 49 **Definitions** 50

51  
52 **Pulmonary TB** was diagnosed based on the pathological, clinical, and radiological  
53  
54 findings, and confirmed through bacteriological and histological examinations, which  
55  
56 were strictly performed according to the Chinese Diagnostic criteria for PTB  
57  
58 (WS-288-2008) .<sup>28</sup>  
59  
60



1  
2  
3  
4 **Patient delay** is determined as a time interval from the first onset of TB symptoms to  
5 the first visit to any health provider; if the time interval lasts for more than 14 days, it  
6 is considered as a “delay”.<sup>29</sup>  
7  
8

9  
10 **Diagnostic delay** is defined as a time interval between a patient’s first visit to any  
11 health provider and the final diagnosis as TB; if the time interval lasts for more than  
12 14 days, it is considered as a “delay”.<sup>29</sup>  
13  
14

15  
16 **Pre-diagnosis** is the period from the onset of TB symptoms to the first visit to a local  
17 designated TB medical institution. **The period of diagnosis** is from the first visit to a  
18 local designated TB medical institution to the diagnosis of TB. **The period of**  
19 **treatment** is the full course of TB treatment.  
20  
21  
22  
23

24  
25 **Direct medical costs** are composed of consultation fees, laboratory tests, X-rays,  
26 medical tests, and drugs during the period of pre-diagnosis, diagnosis, and treatment.  
27  
28

29  
30 **OOP payments** are regarded as the direct medical costs paid by patients themselves.  
31  
32

### 33 **Measuring the incidence and intensity of catastrophic health expenditure**

34

35  
36 CHE is usually assessed by incidence and intensity. According to the definition of  
37 CHE in several previous studies<sup>11 13 14</sup>, we defined ‘catastrophic’ as the OOP  
38 payments of total medical costs for TB care exceeding 10% of the annual household  
39 income in this study. Head count (HC) is used to measure the incidence of CHE,  
40 while the mean gap (MG) and mean positive gap (MPG) are used to reflect the  
41 intensity of CHE. HC means the percentage of households whose OOP payments  
42 equal or exceed 10% of their annual income to the total number of households. MG is  
43 the average amount by which OOP payments, as a proportion of annual household  
44 income, exceeds the threshold. MPG is equal to  $MG/HC$ , the excess expenditure per  
45 household experiencing CHE. The methods used in measuring HC, MG, and MPG  
46 are based on the previous study.<sup>14</sup>  
47  
48  
49  
50  
51  
52  
53  
54  
55  
56

### 57 **Statistical analysis**

58  
59  
60

1  
2  
3  
4 Data were double entered and checked using EPI Data Version 3. Data analysis was  
5 performed using Statistical Package for the Social Sciences (SPSS) Version 18.0  
6 (SPSS Inc. Chicago, IL, USA). Continuous variables were presented as medians and  
7 interquartile (IQR) ranges, while categorical variables were presented as numbers and  
8 percentages (%). Pearson's chi-square test was used in univariate analyses to identify  
9 factors associated with the CHE and odds ratios with 95% confidence intervals (95%  
10 CIs) were computed. All variables with a *P*-value <0.05 in the univariate analysis  
11 were included in the multivariate model. A multivariate logistic regression model  
12 using a backward elimination method was used to assess the determinants of CHE  
13 and to calculate adjusted odds ratios (aOR) and 95% CIs. A two-sided *P*-value of  
14 <0.05 was considered statistically significant.  
15  
16  
17  
18  
19  
20  
21  
22  
23  
24  
25

### 26 **Ethics approval**

27  
28 The study was approved by the Ethical Committee of the Chongqing Institute of  
29 Tuberculosis Prevention and Treatment, Chongqing, China. Written informed  
30 consent was obtained from each participant prior to inclusion in the survey.  
31  
32  
33  
34

### 35 **Patient and public involvement**

36 Not applicable to this study.  
37  
38  
39  
40  
41  
42  
43  
44  
45  
46  
47  
48  
49  
50  
51  
52  
53  
54  
55  
56  
57  
58  
59  
60

## RESULTS

### Patient characteristics

The characteristics of these pulmonary TB patients are summarized in Table 1. A total of 1199 PTB patients were enrolled in the study. The proportion of men to women involved in this study is 2.3:1. More than three-quarters of patients were in their labor age (16–59 years), and the average age of the patients was 43.9 years, with a median age of 44 years. Approximately 30% of patients were migrants. Two-thirds of patients were married and received at least junior high school education. About one-quarter of patients were unemployed, about 30% patients were peasants and 8.0% patients were students. Approximately three-quarters of the households had one to three family members. In the majority, 89.2% of the patients had health insurance and about half of the patients had NCMS. Only 15.9% of patients had been hospitalized in the intensive period. Approximately three-quarters of patients were smearing negative. Of the total participants, 53.0% and 43.0% patients experienced patient and diagnostic delay, with a median (IQR) of 16(3-52) and 9 (3-33) days measured in days, respectively. Patients' average annual household income was 42,200 RMB, with a median (IQR) of 35,000 RMB (20,000–56,000 RMB).

### Direct medical costs for TB in different periods of medical treatment

The OOP costs and health insurance reimbursement during the pre-diagnosis, diagnosis, and treatment period are presented in Table 2. Expenses in the pre-diagnosis period were all paid by OOP, accounting for nearly half of the total cost. Excluding the fees covered by free TB service policy, around 7% of costs were reimbursed by health insurance during the treatment period, but no costs were reimbursed during the period of pre-diagnosis and diagnosis. The median total direct medical costs paid by a TB patient were 4085 RMB, about 93% of which was paid by patients themselves.

### Incidence and intensity of CHE

1  
2  
3  
4 Table 3 shows that 52.8% (633/1199) of all TB-related households experienced CHE.  
5  
6 On average, healthcare payments for TB were 18.1% higher than the threshold value  
7  
8 (10%). For households experiencing CHE, the mean positive gap was 34.2% higher  
9  
10 than the threshold. The incidence of CHE in patients experiencing patient delay or  
11  
12 diagnostic delay was 11% or 9.7% more than those not suffering patient delay or  
13  
14 diagnostic delay, respectively. The intensity measure was also higher for the group of  
15  
16 experiencing patient delay or diagnostic delay than the group without delay.

### 17 18 **Determinants of CHE**

19  
20  
21 Table 4 shows the influence of different variables on CHE for TB care using a  
22  
23 Pearson's chi-square test. There are many factors associated with CHE, including  
24  
25 patient delay, diagnostic delay, sex, age, resident status, marital status, educational  
26  
27 level, occupation, health insurance status, and hospitalization. Those factors were  
28  
29 included in the multivariate logistic regression.

30  
31  
32 Logistic regression produced a wide range of determinants related to catastrophic  
33  
34 health expenditure (Table 5). Independent determinants of CHE were: patient delay  
35  
36 (aOR, 1.342; 95% confidence interval (CI), 1.043–1.726), diagnostic delay (aOR,  
37  
38 1.540; 95% CI, 1.195–1.983), male (aOR, 1.141; 95% CI, 1.066–1.877), age $\geq$ 60  
39  
40 years (aOR, 2.117; 95% CI, 1.281–3.498), inhabitant (aOR, 1.455; 95% CI, 1.084–  
41  
42 1.951), divorced or a widow (aOR, 2.211; 95% CI, 1.093–4.475), peasant (aOR,  
43  
44 2.205; 95% CI, 1.522–3.194), high school and above (aOR, 0.542; 95% CI, 0.356–  
45  
46 0.826) and as NCMS membership (aOR, 1.688; 95% CI, 1.071–2.661). However,  
47  
48 hospitalization was not related to CHE after controlling for other variables (aOR,  
49  
50 1.342; 95% CI, 0.950–1.897).

1  
2  
3  
4  
5  
6  
7  
8  
9  
10  
11  
12  
13  
14  
15  
16  
17  
18  
19  
20  
21  
22  
23  
24  
25  
26  
27  
28  
29  
30  
31  
32  
33  
34  
35  
36  
37  
38  
39  
40  
41  
42  
43  
44  
45  
46  
47  
48  
49  
50  
51  
52  
53  
54  
55  
56  
57  
58  
59  
60

For peer review only

## DISCUSSION

For the first time, global TB targets aimed to decrease catastrophic costs associated with TB. Evaluating the incidence and intensity of TB-related CHE not only provided insight into the universal health coverage (UHC) but also reflected the economic burden of TB patients and their families. In this study, the incidence of CHE for TB care was 52.8% after reimbursement, which was lower than the reported rates of 66.8%, 65% and 78.1% in other cities of China, Nigeria, and Benin, respectively, using the same CHE measurement methods.<sup>11 13 17</sup> However, the figure was a little higher than that in Indonesia (50%) when they involved in MDR-TB patients,<sup>24</sup> and much higher than the rate of CHE incurred by general population or patients with non-communicable chronic disease in China.<sup>19</sup> In that TB inequitably affects poor people and households in poorer economic quintiles are more at risk of suffering CHE and impoverishment.<sup>19 30</sup> The mean gap was 18.1% and the mean positive gap was 34.2% for TB in our study, both were higher than that in Nigeria (6.0%, 9.3%)<sup>11 13</sup> and in Benin (7.8%,14.8%)<sup>13</sup> but lower than that in other cities of China (40.8%, 62.2%)<sup>17</sup> because we did not take non-medical costs into account while other studies did. Although many studies claimed that non-medical costs and indirect costs related to TB care were a severe financial burden for TB patients and their households,<sup>5 31 32</sup> some studies found that these costs were not high compared with direct medical costs.<sup>18 33 34</sup> Thus, the extent of patients incurring catastrophic costs in this study population may be underestimated but remain reliable.

Although all patients in this study have access to free TB treatment and the majority of them have health insurance, they had a heavy financial burden of out-of-pocket payments and more than half of them incurred catastrophic costs. The phenomena is common in China,<sup>8 18 35</sup> there may be three reasons to explain it: (i) Many associated health-care costs are not covered in the free TB policy, for example, payment for drugs of ancillary and liver protection, and extra diagnostic tests.<sup>2 8 36</sup> (ii) Driven by profits, doctors may prescribe additional medicines and tests.<sup>37</sup> (iii) The reimbursement ratio for outpatient services is low and often ignored, as well as the

1  
2  
3  
4 actual implementation strength of inpatients reimbursement was weak.<sup>38-40</sup> Besides,  
5 we also found nearly half of all OOP payments were paid before diagnosis, which  
6 was similar to many previous studies.<sup>6 23 41</sup> This cost had aroused particular concern  
7 in that it not only reflected the economic burden on families for obtaining a  
8 diagnosis, but also may act as an obstacle for poor patients to access timely TB care.  
9  
10  
11  
12  
13

14 Delay in diagnosis had a massive impact on TB transmission in the community,  
15 aggravating the severity and mortality, resulting in an unfavorable treatment outcome  
16 and significantly increasing total patient costs.<sup>42-45</sup> This study, we further investigated  
17 the relationship between patient/diagnostic delay and CHE for TB care among TB  
18 patients. We found about half patients encountered patient delay or diagnostic delay,  
19 who incurred more serious CHE than those without delay. Also, we demonstrated  
20 that patient delay and diagnostic delay were crucial determinants of CHE.  
21 Consistently, Laokri et al found that patient delay over 1 month was an independent  
22 determinant of incurring catastrophic expenditure.<sup>11</sup> In addition, a large number of  
23 studies had revealed that patient delay and diagnostic delay were independent factors  
24 associated with total out-of-pocket costs.<sup>23 25 34 35 46</sup> Actually, prolonged delays in TB  
25 diagnosis are still prevailing problems in many countries in many low- and  
26 middle-income countries, such as in Ethiopia, Zambia, Tanzania, Mozambique,  
27 Indonesia and so on.<sup>43 47-50</sup> Therefore, it is vital to take measures to shorten the delay  
28 in diagnosis.  
29  
30  
31  
32  
33  
34  
35  
36  
37  
38  
39  
40  
41  
42  
43

44 Patient delay may be related to the fact that patients do not take minor symptoms  
45 seriously in its early stage and will pay greater attention to it until symptoms become  
46 more severe.<sup>38</sup> In addition, many sociodemographic and economic factors contribute  
47 to patient delay.<sup>29</sup> Therefore, we should adopt comprehensive measures to facilitate  
48 patients to seek care early, such as strengthening TB health education to the public  
49 and adopting a precise poverty alleviation to increase the income of poverty-stricken  
50 patients. Early diagnosis is difficult due to the vast percentage of asymptomatic PTB  
51 patients and non-availability of rapid, accurate, and cost-effective tests in many  
52 settings.<sup>51</sup> In this study, only one-quarter of patients has been confirmed  
53  
54  
55  
56  
57  
58  
59  
60

1  
2  
3  
4 bacteriological and mainly based on traditional methods. Rapid molecular methods  
5 were not frequently used in Chongqing in 2013. Hence, more rapid, accurate, and  
6 affordable methods are urgently needed to shorten the time of diagnosis.  
7  
8

9  
10 Multivariate regression analysis indicated that demographic factors such as age,  
11 sex, marital status, occupation, resident status, and education level independently  
12 affected the risk of catastrophic costs for TB care. Consistent with previous studies in  
13 Nigeria and other cities of China, age was an essential determinant of CHE,<sup>11 17</sup> but  
14 only patients who were  $\geq 60$  years significantly affect CHE after removing the  
15 confounding factors in our study. Usually, men were the breadwinner of a family,  
16 thus we and Ukwaja et al found male patients were more easily to experience CHE,<sup>11</sup>  
17 but Zhou et al showed that gender had no significant associations with CHE.<sup>17</sup> In  
18 contrast with a previous study in China,<sup>17</sup> we found marital status was an  
19 independent factor related with CHE, but the family size and hospitalization were not  
20 determinants of CHE because we grouped different segments of the household  
21 population. Besides, only 15.9% of patients had been hospitalized during the  
22 treatment, much lower than the figure in a previous study of 55%.<sup>17</sup> Generally,  
23 people with low educational level also have less economic income, and thus we all  
24 demonstrated patients with less education were more likely to incur CHE.<sup>11 13</sup>  
25 Compared with inhabitants, migrants had a smaller proportion of patients being male,  
26 elderly, or peasant and a higher proportion of patients with high educational level,  
27 thus migrant patients were less likely to experience CHE compared with inhabitant  
28 patients.  
29  
30  
31  
32  
33  
34  
35  
36  
37  
38  
39  
40  
41  
42  
43  
44  
45  
46  
47

48 We found that patients covered by NCMS, compared with those without any type  
49 of health insurance, were more likely to experience CHE. A series of studies  
50 conducted in China have demonstrated that NCMS could not relieve the financial  
51 burden of TB-related medical costs and had a partial effect on protecting TB-related  
52 households from CHE.<sup>17 39 52</sup> Compared with patients not covered by NCMS,  
53 patients with TB covered by the NCMS only had a 5% higher reimbursement rate  
54 regarding outpatient and total medical costs in Zhejiang and Sichuan provinces of  
55  
56  
57  
58  
59  
60



1  
2  
3  
4 China.<sup>39</sup> NCMS is designed exclusively for rural residents particular for peasants,  
5 who are usually in low-income status. Also, the majority of patients without health  
6 insurance were migrants. In contrast with the previous study in China, we did not  
7 find MIUR or MIUE has any positive effect on reducing CHE.<sup>17</sup> It may be due to  
8 in-effective reimbursement rates of health insurance in China. Although health  
9 insurance had reimbursement to both outpatient and inpatient services at a certain  
10 proportion, a lot of areas existed to ignore reimbursement to varying degrees,  
11 especially for outpatient services.<sup>40</sup> In research, there was no reimbursement for  
12 medical costs during pre-diagnosis and diagnosis, which indicated that the  
13 implementation effect of reimbursement rates was weak. Thus, so far health  
14 insurance plan did not actually help to relieve the financial burden for patients with  
15 PTB in China. Consequently, the health insurance policy should be implemented  
16 effectively.  
17  
18  
19  
20  
21  
22  
23  
24  
25  
26  
27  
28  
29

30 This study has some limitations. Firstly, some data collected based on  
31 self-reporting could not be checked, which may be subjected to recall bias. Secondly,  
32 the data in this study were collected four years ago, and the per capita income has  
33 increased from 2014 to 2017. However, China's free TB service policy has not  
34 changed in recent years, and TB inequitably affects poor people. Therefore, the CHE  
35 remains a problem for TB now in China. Thirdly, we did not use the new definition  
36 of "catastrophic costs due to TB" recommended by WHO, which is the total [direct  
37 and indirect] costs exceeding 20% of annual household income recently.<sup>15</sup> Although  
38 the threshold (10%) we set was lower than the new definition and we did not take  
39 indirect costs into account, it may also be valuable to present the proportion of  
40 TB-affected patients (and their households) facing catastrophic costs if direct costs  
41 alone are counted.<sup>15</sup> Furthermore, the data about the CHE associated with TB were  
42 limited worldwide and correlational research has been conducted only in three cities  
43 in China. Consequently, our study may add some new data of CHE for TB care in  
44 China.  
45  
46  
47  
48  
49  
50  
51  
52  
53  
54  
55  
56  
57  
58  
59  
60

## CONCLUSION

1  
2  
3  
4 Although all patients have access to free TB service policy and the majority of them  
5 have health insurance, TB patients still shoulder a high burden of OOP payments and  
6 experience high incidence and intensity of CHE for TB care in Chongqing, China.  
7  
8 Except for social-demographic factors, patient delay and diagnostic delay are  
9 essential determinants of CHE for TB care, which highlights the significance of early  
10 care seeking and early diagnosis. In addition, NCMS aggravates the catastrophic  
11 costs, which implicates that it is essential to improve the actual reimbursement rates  
12 of health insurance, especially for outpatients. Furthermore, more fine-tuned  
13 interventions such as precise poverty alleviation are essential to taken for vulnerable  
14 TB patients to reduce their catastrophic costs. Overall, our results have provided  
15 some baseline data about CHE for TB, which may give some clues for a further  
16 prospective study.  
17  
18  
19  
20  
21  
22  
23  
24  
25  
26  
27  
28  
29  
30

31 **Acknowledgments** We thank the participants who have generously devoted their  
32 time and the staff in the study sites where this work has been conducted for their  
33 support in making this work done. Great thanks to professor Bradley Chen from  
34 National Yang-Ming University of Taiwan and professor Chen-Yuan Chiang from  
35 International Union against Tuberculosis and Lung Disease for their professional  
36 suggestions in manuscript writing.  
37  
38  
39  
40  
41  
42

43 **Contributors** DH: designed the study and drafted the manuscript; YL: designed the  
44 study, implemented the survey and analyzed the data; WD: designed the study,  
45 analyzed the data and drafted the manuscript; WZ, CW, QW, and YY: implemented  
46 the survey and collected data; HL: analyzed the data and drafted the manuscript. All  
47 authors read and approved the final version of the manuscript.  
48  
49  
50  
51  
52

53 **Funding** This work was supported by the research funding from Chongqing  
54 Municipal Health Bureau (No.2012-1-087, 2017MSXM124, and 2017MSXM125).  
55  
56  
57

58 **Competing interests** None  
59  
60

1  
2  
3  
4 **Patient consent** Obtained  
5

6 **Ethics approval** The Ethical Committee of Chongqing Institute of Tuberculosis  
7  
8 Prevention and Treatment, Chongqing, China.  
9

10  
11 **Provenance and peer review** Not commissioned; externally peer reviewed  
12

13  
14 **Data sharing statement** No additional data are available  
15  
16  
17  
18  
19  
20  
21  
22  
23  
24  
25  
26  
27  
28  
29  
30  
31  
32  
33  
34  
35  
36  
37  
38  
39  
40  
41  
42  
43  
44  
45  
46  
47  
48  
49  
50  
51  
52  
53  
54  
55  
56  
57  
58  
59  
60

For peer review only

## REFERENCES

1. World Health Organization. Global tuberculosis report 2018. World Health Organization, Geneva, France, WHO/CDS/TB/2018:20.
2. Jackson S, Sleight AC, Wang GJ, Liu XL. Poverty and the economic effects of TB in rural China. *Int J Tuberc Lung Dis* 2006;10:1104-1110.
3. World Health Organization. The end TB strategy. Geneva, Switzerland; 2014.
4. Diel R, Vandeputte J, de Vries G, Stillo J, Wanlin M, Nienhaus A. Costs of tuberculosis disease in the European Union: a systematic analysis and cost calculation. *Eur Respir J* 2014;43:554-565.
5. Tanimura T, Jaramillo E, Weil D, Raviglione M, Lönnroth K. Financial burden for tuberculosis patients in low- and middle-income countries: a systematic review. *Eur Respir J* 2014;43:1763-1775.
6. Ukwaja KN, Modebe O, Igwenyi C, Alobu I. The economic burden of tuberculosis care for patients and households in Africa: a systematic review. *Int J Tuberc Lung Dis* 2012;16:733-739.
7. Laurence YV, Griffiths UK, Vassall A. Costs to Health Services and the Patient of Treating Tuberculosis: A Systematic Literature Review. *Pharmacoeconomics* 2015;33:939-955.
8. Long Q, Smith H, Zhang T, Tang S, Garner P. Patient medical costs for tuberculosis treatment and impact on adherence in China: a systematic review. *BMC Public Health* 2011;11:393.
9. Choi JW, Choi JW, Kim JH, Yoo KB, Park EC. Association between chronic disease and catastrophic health expenditure in Korea. *BMC Health Serv Res* 2015;15:26.
10. Xu K, Evans DB, Kawabata K, Zeramdini R, Klavus J, Murray CJ. Household catastrophic health expenditure: a multicountry analysis. *Lancet* 2003;362:111-117.
11. Ukwaja KN, Alobu I, Abimbola S, Hopewell PC. Household catastrophic payments for tuberculosis care in Nigeria: incidence, determinants, and policy implications for universal health coverage. *Infect Dis Poverty* 2013;2:21.
12. Pal R. Measuring incidence of catastrophic out-of-pocket health expenditure: with application to India. *Int*

- 1  
2  
3  
4 *J Health Care Finance Econ* 2012;12:63-85.  
5  
6  
7 13. Laokri S, Dramaix-Wilmet M, Kassa F, Anagonou S, Dujardin B. Assessing the economic burden of  
8 illness for tuberculosis patients in Benin: determinants and consequences of catastrophic health  
9 expenditures and inequities. *Trop Med Int Health* 2014;19:1249-1258.  
10  
11  
12  
13 14. Wagstaff A, van Doorslaer E. Catastrophe and impoverishment in paying for health care: with applications  
14 to Vietnam 1993-1998. *Health Econ* 2003;12:921-934.  
15  
16  
17  
18 15. Tuberculosis patient cost surveys: a hand book. Geneva: World Health Organization; 2017.  
19 License: CC BY-NC-SA 3.0 IGO.  
20  
21  
22  
23 16. Prasanna T, Jayashree K, Chinnakali P, Bahurupi Y, Vasudevan K, Das M. Catastrophic costs of  
24 tuberculosis care: a mixed methods study from Puducherry, India. *Glob Health Action* 2018;11:1477493.  
25  
26  
27  
28 17. Zhou C, Long Q, Chen J, Xiang L, Li Q, Tang S, Huang F, Sun Q, Lucas H. Factors that determine  
29 catastrophic expenditure for tuberculosis care: a patient survey in China. *Infect Dis Poverty* 2016;5:6.  
30  
31  
32  
33 18. Chen S, Zhang H, Pan Y, Long Q, Xiang L, Yao L, Lucas H. Are free anti-tuberculosis drugs enough? An  
34 empirical study from three cities in China. *Infect Dis Poverty* 2015;4:47.  
35  
36  
37  
38 19. Li Y, Wu Q, Xu L, Legge D, Hao Y, Gao L, Ning N, Wan G. Factors affecting catastrophic health  
39 expenditure and impoverishment from medical expenses in China: policy implications of universal health  
40 insurance. *Bull World Health Organ* 2012;90:664-671.  
41  
42  
43  
44 20. Holtgrave DR, Crosby RA. Social determinants of tuberculosis case rates in the United States. *Am J Prev*  
45 *Med* 2004;26:159-162.  
46  
47  
48  
49 21. Mauch V, Bonsu F, Gyapong M, Awini E, Suarez P, Marcelino B, Melgen RE, Lönnroth K, Nhung NV,  
50 Hoa NB, Klinkenberg E. Free tuberculosis diagnosis and treatment are not enough: patient cost evidence  
51 from three continents. *Int J Tuberc Lung Dis* 2013;17:381-387.  
52  
53  
54  
55 22. Wingfield T, Boccia D, Tovar M, Gavino A, Zevallos K, Montoya R, Lönnroth K, Evans CA. Defining  
56 catastrophic costs and comparing their importance for adverse tuberculosis outcome with multi-drug  
57 resistance: a prospective cohort study, Peru. *PLoS Med* 2014;11:e1001675.  
58  
59  
60

- 1  
2  
3  
4 23. Asres A, Jerene D, Deressa W. Pre- and post-diagnosis costs of tuberculosis to patients on Directly  
5 Observed Treatment Short course in districts of southwestern Ethiopia: a longitudinal study. *J Health*  
6 *Popul Nutr* 2018;37:15.  
7  
8  
9  
10 24. Fuady A, TAJ H, Mansyur M, Richardus JH. Catastrophic total costs in tuberculosis-affected households  
11 and their determinants since Indonesia's implementation of universal health coverage. *Infect Dis Poverty*  
12 2018;7:3.  
13  
14  
15  
16 25. Mesfin MM, Newell JN, Madeley RJ, Mirzoev TN, Tareke IG, Kifle YT, Gessesew A, Walley JD. Cost  
17 implications of delays to tuberculosis diagnosis among pulmonary tuberculosis patients in Ethiopia. *BMC*  
18 *Public Health* 2010;10:173.  
19  
20  
21  
22  
23 26. Getnet F, Demissie M, Assefa N, Mengistie B, Worku A. Delay in diagnosis of pulmonary tuberculosis in  
24 low-and middle-income settings: systematic review and meta-analysis. *BMC Pulm Med* 2017;17:202.  
25  
26  
27  
28 27. Wu B, Yu Y, Xie W, Liu Y, Zhang Y, Hu D, Li Y. Epidemiology of tuberculosis in Chongqing, China: a  
29 secular trend from 1992 to 2015. *Sci Rep* 2017;7:7832.  
30  
31  
32  
33 28. WS-288-2008. Diagnostic criteria for pulmonary tuberculosis. Ministry of health of the People's Republic of  
34 China, 2008.  
35  
36  
37 29. Li Y, Ehiri J, Tang S, Li D, Bian Y, Lin H, Marshall C, Cao J. Factors associated with patient, and  
38 diagnostic delays in Chinese TB patients: a systematic review and meta-analysis. *BMC Med* 2013;11:156.  
39  
40  
41  
42 30. Rocha C, Montoya R, Zevallos K, Curatola A, Ynga W, Franco J, Fernandez F, Becerra N, Sabaduche M,  
43 Tovar MA, Ramos E, Tapley A, Allen NR, Onifade DA, Acosta CD, Maritz M, Concha DF, Schumacher  
44 SG, Evans CA. The Innovative Socio-economic Interventions Against Tuberculosis (ISIAT) project: an  
45 operational assessment. *Int J Tuberc Lung Dis* 2011;15 Suppl 2:50-57.  
46  
47  
48  
49  
50  
51 31. Li Q, Jiang W, Wang Q, Shen Y, Gao J, Sato KD, Long Q, Lucas H. Non-medical financial burden in  
52 tuberculosis care: a cross-sectional survey in rural China. *Infect Dis Poverty* 2016;5:5.  
53  
54  
55  
56 32. da SAR, Pinto M, Trajman A. Patient costs for the diagnosis of tuberculosis in Brazil: comparison of  
57 Xpert MTB/RIF and smear microscopy. *Int J Tuberc Lung Dis* 2014;18:547-551.  
58  
59  
60

- 1  
2  
3  
4 33. Bay V, Tabarsi P, Rezapour A, Marzban S, Zarei E. Cost of Tuberculosis Treatment: Evidence from Iran's  
5 Health System. *Osong Public Health Res Perspect* 2017;8:351-357.  
6  
7  
8  
9 34. Pan HQ, Bele S, Feng Y, Qiu SS, Lü JQ, Tang SW, Shen HB, Wang JM, Zhu LM. Analysis of the  
10 economic burden of diagnosis and treatment of tuberculosis patients in rural China. *Int J Tuberc Lung Dis*  
11 2013;17:1575-1580.  
12  
13  
14  
15 35. Qiu S, Pan H, Zhang S, Peng X, Zheng X, Xu G, Wang M, Wang J, Lu H. Is tuberculosis treatment really  
16 free in China? A study comparing two areas with different management models. *PLoS One*  
17 2015;10:e0126770.  
18  
19  
20  
21  
22 36. Liu Q, Smith H, Wang Y, Tang S, Wang Q, Garner P. Tuberculosis patient expenditure on drugs and tests  
23 in subsidised, public services in China: a descriptive study. *Trop Med Int Health* 2010;15:26-32.  
24  
25  
26  
27 37. Zhan S, Wang L, Yin A, Blas E. Revenue-driven in TB control--three cases in China. *Int J Health Plann*  
28 *Manage* 2004;19 Suppl 1: S63-78.  
29  
30  
31  
32 38. Zhang T, Tang S, Jun G, Whitehead M. Persistent problems of access to appropriate, affordable TB  
33 services in rural China: experiences of different socio-economic groups. *BMC Public Health* 2007;7:19.  
34  
35  
36  
37 39. Wei X, Zou G, Yin J, Walley J, Zhang X, Li R, Sun Q. Effective reimbursement rates of the rural health  
38 insurance among uncomplicated tuberculosis patients in China. *Trop Med Int Health* 2015;20:304-311.  
39  
40  
41  
42 40. Li W, Li X, Zhang H, Li R, Cheng J, Wang L. An investigation of the current health insurance status of  
43 pulmonary tuberculosis cases without drug resistance in certain areas of China. *Chin Prev Med (in*  
44 *Chinese)* 2012;13(6):401-5.  
45  
46  
47  
48 41. Ayé R, Wyss K, Abdualimova H, Saidaliev S. Household costs of illness during different phases of  
49 tuberculosis treatment in Central Asia: a patient survey in Tajikistan. *BMC Public Health* 2010;10:18.  
50  
51  
52  
53 42. Harris TG, Sullivan MJ, Proops D. Delay in diagnosis leading to nosocomial transmission of tuberculosis  
54 at a New York City health care facility. *Am J Infect Control* 2013;41:155-160.  
55  
56  
57  
58 43. Mahato RK, Laohasiriwong W, Vaeteewootacharn K, Koju R, Bhattarai R. Major Delays in the Diagnosis  
59 and Management of Tuberculosis Patients in Nepal. *J Clin Diagn Res* 2015;9:LC05-09.  
60

- 1  
2  
3  
4 44. Kuznetsov VN, Grjibovski AM, Mariandyshev AO, Johansson E, Bjune GA. Two vicious circles  
5 contributing to a diagnostic delay for tuberculosis patients in Arkhangelsk. *Emerg Health Threats J*  
6 2014;7:24909.  
7  
8  
9  
10 45. Lui G, Wong RY, Li F, Lee MK, Lai RW, Li TC, Kam JK, Lee N. High mortality in adults hospitalized  
11 for active tuberculosis in a low HIV prevalence setting. *PLoS One* 2014;9:e92077.  
12  
13  
14 46. Aspler A, Menzies D, Oxlade O, Banda J, Mwenge L, Godfrey-Faussett P, Ayles H. Cost of tuberculosis  
15 diagnosis and treatment from the patient perspective in Lusaka, Zambia. *Int J Tuberc Lung Dis*  
16 2008;12:928-935.  
17  
18  
19 47. Storla DG, Yimer S, Bjune GA. A systematic review of delay in the diagnosis and treatment of  
20 tuberculosis. *BMC Public Health* 2008;8:15.  
21  
22  
23 48. Fuge TG, Bawore SG, Solomon DW, Hegana TY. Patient delay in seeking tuberculosis diagnosis and  
24 associated factors in Hadiya Zone, Southern Ethiopia. *BMC Res Notes* 2018;11:115.  
25  
26  
27 49. Said K, Hella J, Mhalu G, Chiryankubi M, Masika E, Maroa T, Mhimbira F, Kapalata N, Fenner L.  
28 Diagnostic delay and associated factors among patients with pulmonary tuberculosis in Dar es Salaam,  
29 Tanzania. *Infect Dis Poverty* 2017;6:64.  
30  
31  
32 50. Needham DM, Foster SD, Tomlinson G, Godfrey-Faussett P. Socio-economic, gender and health services  
33 factors affecting diagnostic delay for tuberculosis patients in urban Zambia. *Trop Med Int Health*  
34 2001;6:256-259.  
35  
36  
37 51. Xu W, Lu W, Zhou Y, Zhu L, Shen H, Wang J. Adherence to anti-tuberculosis treatment among  
38 pulmonary tuberculosis patients: a qualitative and quantitative study. *BMC Health Serv Res* 2009;9:169.  
39  
40  
41 52. Xiang L, Pan Y, Hou S, Zhang H, Sato KD, Li Q, Wang J, Tang S. The impact of the new cooperative  
42 medical scheme on financial burden of tuberculosis patients: evidence from six counties in China. *Infect*  
43  
44  
45  
46  
47  
48  
49  
50  
51  
52  
53  
54  
55  
56  
57  
58  
59  
60



1  
2  
3  
4  
5  
6  
7  
8  
9  
10  
11  
12  
13  
14  
15  
16  
17  
18  
19  
20  
21  
22  
23  
24  
25  
26  
27  
28  
29  
30  
31  
32  
33  
34  
35  
36  
37  
38  
39  
40  
41  
42  
43  
44  
45  
46  
47  
48  
49  
50  
51  
52  
53  
54  
55  
56  
57  
58  
59  
60

For peer review only

**Table 1 Social-demographic and clinical characteristics of the study participants (n=1199).**

| Variables                 | Patients No. | Percent (%) |
|---------------------------|--------------|-------------|
| <b>Sex</b>                |              |             |
| Male                      | 839          | 70.0        |
| Female                    | 360          | 30.0        |
| <b>Age</b>                |              |             |
| ≤40                       | 532          | 44.4        |
| 41-59                     | 402          | 33.5        |
| ≥60                       | 265          | 22.1        |
| <b>Residential status</b> |              |             |
| Inhabitant                | 848          | 70.7        |
| Migrant                   | 351          | 29.3        |
| <b>Marital status</b>     |              |             |
| Single                    | 340          | 28.4        |
| Married                   | 795          | 66.3        |
| Divorced/widow            | 64           | 5.3         |
| <b>Educational level</b>  |              |             |
| Primary or below          | 382          | 31.9        |
| Junior high               | 356          | 29.7        |

|    |                                |                       |      |
|----|--------------------------------|-----------------------|------|
| 1  |                                |                       |      |
| 2  |                                |                       |      |
| 3  |                                |                       |      |
| 4  |                                | High school and above | 38.4 |
| 5  |                                |                       |      |
| 6  |                                |                       |      |
| 7  | <b>Occupation</b>              |                       |      |
| 8  |                                |                       |      |
| 9  |                                | Unemployed            | 25.2 |
| 10 |                                |                       |      |
| 11 |                                | Employed              | 27.3 |
| 12 |                                |                       |      |
| 13 |                                | Peasant               | 29.4 |
| 14 |                                |                       |      |
| 15 |                                | Student               | 8.0  |
| 16 |                                |                       |      |
| 17 |                                | Retiree               | 10.1 |
| 18 |                                |                       |      |
| 19 |                                |                       |      |
| 20 |                                |                       |      |
| 21 |                                |                       |      |
| 22 |                                |                       |      |
| 23 |                                |                       |      |
| 24 | <b>Family size</b>             |                       |      |
| 25 |                                |                       |      |
| 26 |                                | 1~3                   | 74.0 |
| 27 |                                |                       |      |
| 28 |                                | 4~8                   | 26.0 |
| 29 |                                |                       |      |
| 30 |                                |                       |      |
| 31 |                                |                       |      |
| 32 |                                |                       |      |
| 33 | <b>Health insurance status</b> |                       |      |
| 34 |                                |                       |      |
| 35 |                                | None                  | 10.8 |
| 36 |                                |                       |      |
| 37 |                                | NCMS                  | 45.7 |
| 38 |                                |                       |      |
| 39 |                                | MIUR                  | 19.2 |
| 40 |                                |                       |      |
| 41 |                                | MIUE                  | 20.8 |
| 42 |                                |                       |      |
| 43 |                                |                       |      |
| 44 |                                | Other insurance plan  | 3.5  |
| 45 |                                |                       |      |
| 46 |                                |                       |      |
| 47 |                                |                       |      |
| 48 |                                |                       |      |
| 49 |                                |                       |      |
| 50 | <b>Hospitalization</b>         |                       |      |
| 51 |                                |                       |      |
| 52 |                                | Yes                   | 15.9 |
| 53 |                                |                       |      |
| 54 |                                | No                    | 84.1 |
| 55 |                                |                       |      |
| 56 |                                |                       |      |
| 57 |                                |                       |      |
| 58 |                                |                       |      |
| 59 |                                |                       |      |
| 60 |                                |                       |      |

**Forms of TB**

|                    |     |      |
|--------------------|-----|------|
| Smear-negative PTB | 892 | 74.4 |
| Smear-positive PTB | 307 | 25.6 |

**Patient delay**

|                     |           |      |
|---------------------|-----------|------|
| Yes                 | 635       | 53.0 |
| No                  | 564       | 47.0 |
| Median (IQR) (days) | 16 (3-52) |      |

**Diagnostic delay**

|                     |          |      |
|---------------------|----------|------|
| Yes                 | 516      | 43.0 |
| No                  | 683      | 57.0 |
| Median (IQR) (days) | 9 (3-33) |      |

**Household annual income(RMB)**

|                     |                       |  |
|---------------------|-----------------------|--|
| Mean                | 42,200                |  |
| Median (IQR) (days) | 35,000(20,000-56,000) |  |

---

Note: IQR represents interquartile range. TB represents tuberculosis.

NCMS, New Cooperative Medical Scheme; MIUR, Medical Insurance for Urban Residents; MIUE, Medical Insurance for Urban Employees.

1  
2  
3  
4  
5  
6  
7  
8  
9  
10  
11  
12  
13  
14  
15  
16  
17  
18  
19  
20  
21  
22  
23  
24  
25  
26  
27  
28  
29  
30  
31  
32  
33  
34  
35  
36  
37  
38  
39  
40  
41  
42  
43  
44  
45  
46

**Table 2 Direct medical costs for TB care in different periods of services (n=1199). RMB**

| Costs in different periods<br>(services) | Out-of-pockets |           | Health insurance reimbursement |       | Total  |           |
|------------------------------------------|----------------|-----------|--------------------------------|-------|--------|-----------|
|                                          | Median         | IQR       | Median                         | IQR   | Median | IQR       |
| Pre-diagnosis                            | 750            | 250-3000  | 0                              | 0     | 750    | 250-3000  |
| Diagnosis*                               | 157            | 121-250   | 0                              | 0     | 157    | 121-250   |
| Treatment #                              | 1792           | 834-3050  | 0                              | 0-501 | 1966   | 1000-3723 |
| Total                                    | 3789           | 2106-6645 | 0                              | 0-501 | 4085   | 2222-7371 |

Note: Expenses excludes the costs of the free-TB policy reduction and exemption. \*The expenses excluded the cost of one-time free chest X-ray and sputum smear examination. #The expenses excluded anti-TB drugs (6 months for new patients, 8 months if previously treated ), three times sputum smear tests and one time X-ray test during anti-TB treatment. IQR: interquartile range.

**Table 3 Incidence and intensity of CHE for TB care stratified by patient and diagnostic delay.**

| Catastrophic health expenditure | Patient delay |      | Diagnostic delay |      | All<br>(n=1199) |
|---------------------------------|---------------|------|------------------|------|-----------------|
|                                 | Yes           | No   | Yes              | No   |                 |
| Head count (%)                  | 58.0          | 47.0 | 58.3             | 48.6 | 52.8            |
| Mean gap (%)                    | 21.1          | 14.6 | 19.3             | 17.2 | 18.1            |
| Mean positive gap (%)           | 36.5          | 31.1 | 33.0             | 35.3 | 34.2            |

**Table 4 Single factor analysis of catastrophic health expenditure in patients.**

| Variables               | Experiencing CHE<br>(n,%) | Not<br>experiencing<br>CHE(n,%) | OR (95% CI)        | Chi-square | <i>P-value</i> |
|-------------------------|---------------------------|---------------------------------|--------------------|------------|----------------|
| <b>Patient delay</b>    |                           |                                 |                    |            |                |
| No                      | 265 (47.0)                | 299(53.0)                       | 1.0                |            |                |
| Yes                     | 368(58.0)                 | 267(42.0)                       | 1.555(1.238-1.954) | 14.415     | 0.000          |
| <b>Diagnostic delay</b> |                           |                                 |                    |            |                |
| No                      | 332(48.6)                 | 351(51.4)                       | 1.0                |            |                |
| Yes                     | 301(58.3)                 | 215(41.7)                       | 1.480(1.175-1.864) | 11.153     | 0.001          |
| <b>Sex</b>              |                           |                                 |                    |            |                |
| Female                  | 151(41.9)                 | 209(58.1)                       | 1.0                |            |                |
| Male                    | 482(57.4)                 | 357(42.6)                       | 1.869(1.455-2.400) | 24.300     | 0.000          |

**Age**

|       |           |           |                    |        |       |
|-------|-----------|-----------|--------------------|--------|-------|
| ≤40   | 200(37.6) | 332(62.4) | 1.0                |        |       |
| 41-59 | 242(60.2) | 160(39.8) | 2.511(1.925-3.275) | 46.936 | 0.000 |
| ≥60   | 191(72.1) | 74(27.9)  | 4.285(3.109-5.904) | 84.156 | 0.000 |

**Resident status**

|            |           |           |                    |        |       |
|------------|-----------|-----------|--------------------|--------|-------|
| Migrant    | 129(36.8) | 222(63.2) | 1.0                |        |       |
| Inhabitant | 504(59.4) | 344(40.6) | 2.521(1.951-3.259) | 51.246 | 0.000 |

**Marital status**

|                |           |           |                    |        |       |
|----------------|-----------|-----------|--------------------|--------|-------|
| Single         | 133(39.1) | 207(60.9) | 1.0                |        |       |
| Married        | 450(56.7) | 344(43.3) | 2.036(1.571-2.638) | 29.377 | 0.000 |
| Divorced/widow | 50(76.9)  | 15(23.1)  | 5.188(2.800-9.613) | 31.488 | 0.000 |



1  
2  
3  
4  
5  
6  
7  
8  
9  
10  
11  
12  
13  
14  
15  
16  
17  
18  
19  
20  
21  
22  
23  
24  
25  
26  
27  
28  
29  
30  
31  
32  
33  
34  
35  
36  
37  
38  
39  
40  
41  
42  
43  
44  
45  
46

**Educational level**

|                       |           |           |                    |         |       |
|-----------------------|-----------|-----------|--------------------|---------|-------|
| Primary or below      | 277(72.5) | 105(27.5) | 1.0                |         |       |
| Junior high           | 190(53.4) | 166(46.6) | 0.434(0.319-0.589) | 29.058  | 0.000 |
| High school and above | 166(36.0) | 295(64.0) | 0.213(0.159-0.286) | 111.600 | 0.000 |

**Occupation**

|            |           |           |                    |        |       |
|------------|-----------|-----------|--------------------|--------|-------|
| Unemployed | 139(46.0) | 163(54.0) | 1.0                |        |       |
| Employed   | 128(39.1) | 199(60.9) | 0.754(0.549-1.036) | 3.044  | 0.081 |
| Peasant    | 261(73.9) | 92(26.1)  | 3.327(2.396-4.519) | 53.331 | 0.000 |
| Student    | 37(38.5)  | 59(61.5)  | 0.735(0.460-1.176) | 1.654  | 0.198 |
| Retiree    | 68(56.2)  | 53(43.8)  | 1.505(0.984-2.300) | 3.577  | 0.059 |

**Family size**

|                                |                      |           |           |                    |        |       |
|--------------------------------|----------------------|-----------|-----------|--------------------|--------|-------|
|                                | 1~3                  | 479(54.0) | 408(46.0) | 1.0                |        |       |
|                                | 4~8                  | 154(49.4) | 158(50.6) | 0.830(0.641-1.075) | 1.997  | 0.158 |
| <b>Health insurance status</b> |                      |           |           |                    |        |       |
|                                | None                 | 47(36.2)  | 83(63.8)  | 1.0                |        |       |
|                                | NCMS                 | 351(64.1) | 197(35.9) | 3.146(2.113-4.685) | 31.853 | 0.000 |
|                                | MIUR                 | 111(48.3) | 119(51.7) | 1.647(1.059-2.561) | 4.910  | 0.027 |
|                                | MIUE                 | 109(43.8) | 140(56.2) | 1.675(0.888-2.128) | 2.042  | 0.153 |
|                                | Other insurance plan | 15(35.7)  | 27(64.3)  | 0.981(0.475-2.027) | 0.003  | 0.959 |
| <b>Hospitalization</b>         |                      |           |           |                    |        |       |
|                                | No                   | 517(51.3) | 491(48.7) | 1.0                |        |       |
|                                | Yes                  | 116(60.7) | 75(39.3)  | 1.469(1.071-2.014) | 5.746  | 0.017 |

**Forms of TB**

|                    |           |           |                    |       |       |
|--------------------|-----------|-----------|--------------------|-------|-------|
| Smear-negative PTB | 480(53.8) | 412(46.2) | 1.0                |       |       |
| Smear-positive PTB | 153(49.8) | 154(50.2) | 0.853(0.658-1.105) | 1.448 | 0.229 |

Note: PTB, pulmonary tuberculosis. OR, odds ratio. 95% CI, 95% confidence interval for the odds ratio.

NCMS, New Cooperative Medical Scheme; MIUR, Medical Insurance for Urban Residents; MIUE, Medical Insurance for Urban Employees.

**Table 5 Independent determinants of CHE for TB care using a logistic regression model.**

| Variables                             | $\beta$ | Standard error | Wald   | <i>P</i> -value | OR(95% CI)         |
|---------------------------------------|---------|----------------|--------|-----------------|--------------------|
| Patient delay (Ref: Without delay)    | 0.294   | 0.128          | 5.251  | 0.022           | 1.342(1.043-1.726) |
| Diagnostic delay (Ref: Without delay) | 0.431   | 0.129          | 11.145 | 0.001           | 1.540(1.195-1.983) |

|    |                                           |        |       |       |       |                    |
|----|-------------------------------------------|--------|-------|-------|-------|--------------------|
| 1  |                                           |        |       |       |       |                    |
| 2  |                                           |        |       |       |       |                    |
| 3  |                                           |        |       |       |       |                    |
| 4  |                                           |        |       |       |       |                    |
| 5  | Sex (Ref: Female)                         | 0.347  | 0.144 | 5.764 | 0.016 | 1.141(1.066-1.877) |
| 6  |                                           |        |       |       |       |                    |
| 7  |                                           |        |       |       |       |                    |
| 8  | Age (Ref: ≤40 )                           |        |       | 8.557 | 0.014 |                    |
| 9  |                                           |        |       |       |       |                    |
| 10 |                                           |        |       |       |       |                    |
| 11 | 41-59                                     | 0.336  | 0.187 | 3.216 | 0.073 | 1.399(0.969-2.019) |
| 12 |                                           |        |       |       |       |                    |
| 13 |                                           |        |       |       |       |                    |
| 14 | ≥60                                       | 0.75   | 0.256 | 8.554 | 0.003 | 2.117(1.281-3.498) |
| 15 |                                           |        |       |       |       |                    |
| 16 |                                           |        |       |       |       |                    |
| 17 | Resident status (Ref: Migrant)            | 0.375  | 0.15  | 6.247 | 0.012 | 1.455(1.084-1.951) |
| 18 |                                           |        |       |       |       |                    |
| 19 |                                           |        |       |       |       |                    |
| 20 | Marital status (Ref: Single)              |        |       | 6.239 | 0.044 |                    |
| 21 |                                           |        |       |       |       |                    |
| 22 | Married                                   | -0.005 | 0.192 | 0.001 | 0.977 | 0.995(0.683-1.448) |
| 23 |                                           |        |       |       |       |                    |
| 24 |                                           |        |       |       |       |                    |
| 25 | Divorced/widow                            | 0.794  | 0.36  | 4.87  | 0.027 | 2.211(1.093-4.475) |
| 26 |                                           |        |       |       |       |                    |
| 27 |                                           |        |       |       |       |                    |
| 28 | Educational level (Ref: Primary or below) |        |       | 8.224 | 0.016 |                    |
| 29 |                                           |        |       |       |       |                    |
| 30 |                                           |        |       |       |       |                    |
| 31 | Junior high                               | -0.294 | 0.187 | 2.485 | 0.115 | 0.745(0.517-1.074) |
| 32 |                                           |        |       |       |       |                    |
| 33 |                                           |        |       |       |       |                    |
| 34 | High school and above                     | -0.612 | 0.215 | 8.114 | 0.004 | 0.542(0.356-0.826) |
| 35 |                                           |        |       |       |       |                    |
| 36 |                                           |        |       |       |       |                    |
| 37 |                                           |        |       |       |       |                    |
| 38 |                                           |        |       |       |       |                    |
| 39 |                                           |        |       |       |       |                    |
| 40 |                                           |        |       |       |       |                    |
| 41 |                                           |        |       |       |       |                    |
| 42 |                                           |        |       |       |       |                    |
| 43 |                                           |        |       |       |       |                    |
| 44 |                                           |        |       |       |       |                    |
| 45 |                                           |        |       |       |       |                    |
| 46 |                                           |        |       |       |       |                    |

1  
2  
3  
4  
5  
6  
7  
8  
9  
10  
11  
12  
13  
14  
15  
16  
17  
18  
19  
20  
21  
22  
23  
24  
25  
26  
27  
28  
29  
30  
31  
32  
33  
34  
35  
36  
37  
38  
39  
40  
41  
42  
43  
44  
45  
46

|                                                   |                      |        |       |        |       |                    |
|---------------------------------------------------|----------------------|--------|-------|--------|-------|--------------------|
| <b>Occupation (Ref: Unemployed)</b>               |                      |        |       | 28.975 | 0.000 |                    |
|                                                   | Employed             | 0.025  | 0.176 | 0.02   | 0.887 | 1.025(0.726-1.448) |
|                                                   | Peasant              | 0.791  | 0.189 | 17.475 | 0.000 | 2.205(1.522-3.194) |
|                                                   | Student              | 0.368  | 0.279 | 1.745  | 0.187 | 1.446(0.837-2.497) |
|                                                   | Retiree              | -0.318 | 0.257 | 1.53   | 0.216 | 0.727(0.439-1.204) |
| <b>Health insurance (Ref: none)</b>               |                      |        |       | 6.355  | 0.174 |                    |
|                                                   | NCMS                 | 0.524  | 0.232 | 5.087  | 0.024 | 1.688(1.071-2.661) |
|                                                   | MIUR                 | 0.358  | 0.248 | 2.085  | 0.149 | 1.431(0.880-2.327) |
|                                                   | MIUE                 | 0.158  | 0.266 | 0.353  | 0.553 | 1.171(0.695-1.974) |
|                                                   | Other insurance plan | 0.169  | 0.398 | 0.181  | 0.671 | 1.184(0.543-2.583) |
| <b>Hospitalization (Ref: not hospitalization)</b> |                      |        |       | 2.784  | 0.095 | 1.342(0.950-1.897) |

Note: The variables that showed association with CHE (p<0.05) in the univariate analysis were included in the multivariate model. OR, odds ratio. 95% CI,95%

1  
2  
3  
4  
5 confidence interval for the odds ratio. Ref, reference group.  
6  
7

8 NCMS, New Cooperative Medical Scheme; MIUR, Medical Insurance for Urban Residents; MIUE, Medical Insurance for Urban Employees.  
9  
10  
11  
12  
13  
14  
15  
16  
17  
18  
19  
20  
21  
22  
23  
24  
25  
26  
27  
28  
29  
30  
31  
32  
33  
34  
35  
36  
37  
38  
39  
40  
41  
42  
43  
44  
45  
46

For peer review only

1  
2  
3  
4  
5  
6  
7  
8  
9  
10  
11  
12  
13  
14  
15  
16  
17  
18  
19  
20  
21  
22  
23  
24  
25  
26  
27  
28  
29  
30  
31  
32  
33  
34  
35  
36  
37  
38  
39  
40  
41  
42  
43  
44  
45  
46  
47  
48  
49  
50  
51  
52  
53  
54  
55  
56  
57  
58  
59  
60

For peer review only

**STROBE 2007 (v4) Statement—Checklist of items that should be included in reports of *cross-sectional studies***

| Section/Topic                | Item # | Recommendation                                                                                                                                                                       | Reported on page #                    |
|------------------------------|--------|--------------------------------------------------------------------------------------------------------------------------------------------------------------------------------------|---------------------------------------|
| Title and abstract           | 1      | (a) Indicate the study's design with a commonly used term in the title or the abstract                                                                                               | Page 1-2                              |
|                              |        | (b) Provide in the abstract an informative and balanced summary of what was done and what was found                                                                                  | Page 2-3                              |
| <b>Introduction</b>          |        |                                                                                                                                                                                      |                                       |
| Background/rationale         | 2      | Explain the scientific background and rationale for the investigation being reported                                                                                                 | Page 4-6                              |
| Objectives                   | 3      | State specific objectives, including any prespecified hypotheses                                                                                                                     | Page 6 line 38-54                     |
| <b>Methods</b>               |        |                                                                                                                                                                                      |                                       |
| Study design                 | 4      | Present key elements of study design early in the paper                                                                                                                              | Page 7 line 9-11                      |
| Setting                      | 5      | Describe the setting, locations, and relevant dates, including periods of recruitment, exposure, follow-up, and data collection                                                      | Page 7 line 9-41                      |
| Participants                 | 6      | (a) Give the eligibility criteria, and the sources and methods of selection of participants                                                                                          | Page 7 line 43-59                     |
| Variables                    | 7      | Clearly define all outcomes, exposures, predictors, potential confounders, and effect modifiers. Give diagnostic criteria, if applicable                                             | Page 8 line 49-58<br>Page 9 line 3-58 |
| Data sources/<br>measurement | 8*     | For each variable of interest, give sources of data and details of methods of assessment (measurement). Describe comparability of assessment methods if there is more than one group | Page 8-9                              |



|                        |     |                                                                                                                                                                                                   |                                  |
|------------------------|-----|---------------------------------------------------------------------------------------------------------------------------------------------------------------------------------------------------|----------------------------------|
| Bias                   | 9   | Describe any efforts to address potential sources of bias                                                                                                                                         | Page 8 line 11-46                |
| Study size             | 10  | Explain how the study size was arrived at                                                                                                                                                         | Page 7 line 43-59                |
| Quantitative variables | 11  | Explain how quantitative variables were handled in the analyses. If applicable, describe which groupings were chosen and why                                                                      | Page 9-10                        |
| Statistical methods    | 12  | (a) Describe all statistical methods, including those used to control for confounding                                                                                                             | Page 10 line 6-26                |
|                        |     | (b) Describe any methods used to examine subgroups and interactions                                                                                                                               | Page 10 line 6-26                |
|                        |     | (c) Explain how missing data were addressed                                                                                                                                                       | No missing data                  |
|                        |     | (d) If applicable, describe analytical methods taking account of sampling strategy                                                                                                                | None                             |
|                        |     | (e) Describe any sensitivity analyses                                                                                                                                                             | None                             |
| <b>Results</b>         |     |                                                                                                                                                                                                   |                                  |
| Participants           | 13* | (a) Report numbers of individuals at each stage of study—eg numbers potentially eligible, examined for eligibility, confirmed eligible, included in the study, completing follow-up, and analysed | Page 7 line 43-60                |
|                        |     | (b) Give reasons for non-participation at each stage                                                                                                                                              | Page 7 line 55-60                |
|                        |     | (c) Consider use of a flow diagram                                                                                                                                                                | None                             |
| Descriptive data       | 14* | (a) Give characteristics of study participants (eg demographic, clinical, social) and information on exposures and potential confounders                                                          | Table 1<br>Page 11               |
|                        |     | (b) Indicate number of participants with missing data for each variable of interest                                                                                                               | No participant with missing data |
| Outcome data           | 15* | Report numbers of outcome events or summary measures                                                                                                                                              | Table 2-5                        |
| Main results           | 16  | (a) Give unadjusted estimates and, if applicable, confounder-adjusted estimates and their precision (eg, 95% confidence                                                                           | Table 4 and 5                    |

|                          |    |                                                                                                                                                                            |                    |
|--------------------------|----|----------------------------------------------------------------------------------------------------------------------------------------------------------------------------|--------------------|
|                          |    | interval). Make clear which confounders were adjusted for and why they were included                                                                                       | Page 12 line 18-47 |
|                          |    | (b) Report category boundaries when continuous variables were categorized                                                                                                  | Table 4 and 5      |
|                          |    | (c) If relevant, consider translating estimates of relative risk into absolute risk for a meaningful time period                                                           | Table 5            |
| Other analyses           | 17 | Report other analyses done—eg analyses of subgroups and interactions, and sensitivity analyses                                                                             | None               |
| <b>Discussion</b>        |    |                                                                                                                                                                            |                    |
| Key results              | 18 | Summarise key results with reference to study objectives                                                                                                                   | Page 17 line4-25   |
| Limitations              | 19 | Discuss limitations of the study, taking into account sources of potential bias or imprecision. Discuss both direction and magnitude of any potential bias                 | Page 16 line 30-57 |
| Interpretation           | 20 | Give a cautious overall interpretation of results considering objectives, limitations, multiplicity of analyses, results from similar studies, and other relevant evidence | Page 13-16         |
| Generalisability         | 21 | Discuss the generalisability (external validity) of the study results                                                                                                      | Page 13-17         |
| <b>Other information</b> |    |                                                                                                                                                                            |                    |
| Funding                  | 22 | Give the source of funding and the role of the funders for the present study and, if applicable, for the original study on which the present article is based              | Page 17 line 51-54 |

\*Give information separately for cases and controls in case-control studies and, if applicable, for exposed and unexposed groups in cohort and cross-sectional studies.

**Note:** An Explanation and Elaboration article discusses each checklist item and gives methodological background and published examples of transparent reporting. The STROBE checklist is best used in conjunction with this article (freely available on the Web sites of PLoS Medicine at <http://www.plosmedicine.org/>, Annals of Internal Medicine at <http://www.annals.org/>, and Epidemiology at <http://www.epidem.com/>). Information on the STROBE Initiative is available at [www.strobe-statement.org](http://www.strobe-statement.org).

# BMJ Open

## The extent and determinants of catastrophic health expenditure for tuberculosis care in Chongqing Municipality, China: a cross-sectional study

|                                 |                                                                                                                                                                                                                                                                                                                                                                                                                                                                                                                                                                                                                                                                                           |
|---------------------------------|-------------------------------------------------------------------------------------------------------------------------------------------------------------------------------------------------------------------------------------------------------------------------------------------------------------------------------------------------------------------------------------------------------------------------------------------------------------------------------------------------------------------------------------------------------------------------------------------------------------------------------------------------------------------------------------------|
| Journal:                        | <i>BMJ Open</i>                                                                                                                                                                                                                                                                                                                                                                                                                                                                                                                                                                                                                                                                           |
| Manuscript ID                   | bmjopen-2018-026638.R2                                                                                                                                                                                                                                                                                                                                                                                                                                                                                                                                                                                                                                                                    |
| Article Type:                   | Research                                                                                                                                                                                                                                                                                                                                                                                                                                                                                                                                                                                                                                                                                  |
| Date Submitted by the Author:   | 19-Feb-2019                                                                                                                                                                                                                                                                                                                                                                                                                                                                                                                                                                                                                                                                               |
| Complete List of Authors:       | Duan, Weixia; Chongqing Institute of Tuberculosis Prevention and Treatment; Chongqing Occupational Diseases Prevention Hospital<br>Zhang, Wen; Chongqing Institute of Tuberculosis Prevention and Treatment<br>Wu, Chengguo; Chongqing Institute of Tuberculosis Prevention and Treatment,<br>Wang, Qingya; Chongqing Institute of Tuberculosis Prevention and Treatment,<br>Yu, Ya; Chongqing Institute of Tuberculosis Prevention and Treatment,<br>Lin, Hui; The Third Military Medical University, Department of Epidemiology<br>Liu, Ying; Chongqing Institute of Tuberculosis Prevention and Treatment,<br>Hu, Daiyu; Chongqing Institute of Tuberculosis Prevention and Treatment, |
| <b>Primary Subject Heading</b>: | Infectious diseases                                                                                                                                                                                                                                                                                                                                                                                                                                                                                                                                                                                                                                                                       |
| Secondary Subject Heading:      | Epidemiology, Public health                                                                                                                                                                                                                                                                                                                                                                                                                                                                                                                                                                                                                                                               |
| Keywords:                       | Tuberculosis < INFECTIOUS DISEASES, Catastrophic health expenditure, Patient delay, Diagnostic delay, health insurance                                                                                                                                                                                                                                                                                                                                                                                                                                                                                                                                                                    |
|                                 |                                                                                                                                                                                                                                                                                                                                                                                                                                                                                                                                                                                                                                                                                           |

SCHOLARONE™  
Manuscripts

1  
2  
3  
4 **Title page**  
5  
6

7 **The extent and determinants of catastrophic health expenditure for tuberculosis**  
8 **care in Chongqing Municipality, China: a cross-sectional study**  
9

10  
11  
12 **Running title: The extent and determinants of CHE for TB care**  
13

14 Weixia Duan<sup>1,2</sup>, Wen Zhang<sup>1</sup>, Chengguo Wu<sup>1</sup>, Qingya Wang<sup>1</sup>, Ya Yu<sup>1</sup>, Hui Lin<sup>3</sup>,  
15 Ying Liu<sup>1\*</sup> and Daiyu Hu<sup>1\*</sup>  
16  
17  
18  
19  
20  
21

22 **Affiliations:**  
23

24  
25 <sup>1</sup>Chongqing Institute of Tuberculosis Prevention and Treatment, No. 71 Longteng  
26 Road, Xiejiawan Street, Jiulongpo District, Chongqing 400050, China.  
27  
28

29  
30 <sup>2</sup>Department of laboratory medicine, Chongqing Occupational Diseases Prevention  
31 Hospital, No. 305 Nancheng Road, Nan'an District, Chongqing 400060, China.  
32  
33

34  
35 <sup>3</sup>Department of Epidemiology, College of Preventive Medicine, The Third Military  
36 Medical University, Gaotanyan Road, Shapingba District, Chongqing 400038, China.  
37  
38

39 **\* Corresponding author:**  
40

41  
42 Professor Ying Liu and Daiyu Hu  
43

44  
45 Chongqing Institute of Tuberculosis Prevention and Treatment, No. 71 Longteng  
46 Road, Xiejiawan Street, Jiulongpo District, Chongqing 400050, China.  
47  
48

49 Phone:+86-023-86133600, Fax:+86-023-86133600  
50

51  
52 Email:Ying Liu([910981960@qq.com](mailto:910981960@qq.com)), Daiyu Hu ([hukaixiou@263.net](mailto:hukaixiou@263.net))  
53  
54  
55  
56  
57  
58  
59  
60

## ABSTRACT

**Objective:** To investigate the extent and associations of patient /diagnostic delay and other potential factors with catastrophic health expenditure (CHE) for tuberculosis (TB) care in Chongqing Municipality, China.

**Design:** A cross-sectional study

**Setting:** Four counties of Chongqing municipality, China

**Participants:** A total of 1199 patients with active pulmonary TB beyond 16 years and without mental disorders were consecutively recruited in the four counties' designated TB medical institutions.

**Outcome measures** The incidence and intensity of CHE for TB care were described. The association between patients' "social-demographic and clinical characteristics such as patient delay, diagnostic delay, forms of TB, health insurance status and hospitalization" and CHE were analyzed using univariate and multivariate logistic regression.

**Results** The incidence of CHE was 52.8% and out-of-pocket payments(OOP) were 93% of the total costs for TB care. Compared with patients without delay, the incidence and intensity of CHE were higher in patients who had patient delay or diagnostic delay. Patients who experienced patient delay or diagnostic delay, who was a male, elderly ( $\geq 60$  years), an inhabitant, a peasant, divorced/widow, the New Cooperative Medical Scheme (NCMS) membership had greater risks of incurring CHE for TB care. Having a higher educational level appeared to be a protective factor. However, hospitalization was not associated with CHE after controlling for other variables.

**Conclusion** The incidence and intensity of CHE for TB care are high, which provides baseline data about catastrophic costs that TB-related households faced in Chongqing of China. Variety of determinants of CHE implicate that it is essential to

1  
2  
3  
4 take effective measures to promote early seeking care and early diagnosis, improve  
5 the actual reimbursement rates of health insurance, especially for outpatients, and  
6 need more fine-tuned interventions such as precise poverty alleviation to reduce  
7 catastrophic costs of the vulnerable population.  
8  
9  
10

11  
12 **Keywords:** Tuberculosis, Catastrophic health expenditure, Patient delay, Diagnostic  
13 delay, Health insurance  
14  
15  
16

### 17 **Strengths and limitations of this study**

18

- 19
- 20 1. The study provides new data about TB-related households facing catastrophic  
21 costs and the determinants of CHE for TB care in China.  
22
  - 23 2. The study highlights the importance of early care seeking and diagnosis of TB.  
24
  - 25 3. Our findings will provide valuable information for policymakers to take fine-tuned  
26 interventions to decrease catastrophic costs for vulnerable TB-affected households.  
27
  - 28 4. Some self-reported data such as dates for onset of symptoms and healthcare  
29 seeking may have been affected by recall bias.  
30
  - 31 5. The non-medical costs and indirect costs were not taken into account, which may  
32 underestimate the extent of CHE for TB care and should be considered in the future  
33 study.  
34  
35  
36  
37  
38  
39  
40  
41  
42  
43  
44  
45  
46  
47  
48  
49  
50  
51  
52  
53  
54  
55  
56  
57  
58  
59  
60

## INTRODUCTION

Tuberculosis (TB) is one of the top 10 causes of death and the leading cause of a single infectious disease (above HIV/AIDS) worldwide. In 2017, about 10.0 million people developed TB disease and 1.6 million deaths caused by TB globally. China has the second largest burden of TB in the world, accounting for 9% of all cases.<sup>1</sup> Poverty is not only strongly associated with TB incidence, but also a cause and a devastating outcome of TB.<sup>2</sup> Therefore, TB is not only a serious infectious disease but also a severe public health problem worldwide. “End TB strategy,” a plan announced by the World Health Organization (WHO) to end the global TB epidemic, aims to reduce TB death rate by 95% and cut new cases by 90% between 2015 and 2035, and no affected families face catastrophic costs due to TB by 2020.<sup>3</sup> However, the projected 2015 baseline is not yet available.<sup>3</sup> Achieving zero TB-induced catastrophic costs for households is too great to realize because the financial burden for patients with TB is extremely high in low-income, middle-income and high-income countries.<sup>4-7</sup> For instance, the mean treatment costs per drug-sensitive (DS-TB) TB patient are \$39 to \$858 in Africa, \$149 to \$724 in China and €3,427 to €10,282 in the EU.<sup>4 6 8</sup>

1  
2  
3  
4 Catastrophic health expenditure (CHE) is a widely used index to calculate the  
5 burden of medical costs upon households at a national level and is often incurred by  
6 households who have to pay out-of-pockets for health services.<sup>9 10</sup> Thus, the family  
7 may have to sacrifice the consumption of other goods and services necessary for their  
8 well-being.<sup>10</sup> There are various definitions of CHE and no one gold standard for  
9 measuring it. <sup>11 12</sup> WHO has defined CHE as OOP payment for direct health care  
10 spending exceeds 40% of a household's capacity, <sup>10</sup> while many studies defined CHE  
11 as OOP payment for health-care that exceeds a specified proportion of annual  
12 household income which often set the threshold at 10%-25%. <sup>11 13 14</sup> According to the  
13 End TB Strategy, it is now recommended to measure catastrophic costs incurred  
14 when the total costs exceed 20% of the annual household income.<sup>15</sup> Eradicating  
15 catastrophic costs for TB-affected families is essential to ascertain the progress of  
16 universal health coverage and social protection. However, the data about CHE for TB  
17 care are limited.

18  
19  
20  
21  
22  
23  
24  
25  
26  
27  
28  
29  
30  
31  
32 A recent systematic review indicated that approximately a third of households with  
33 a TB patient experienced TB-associated catastrophic costs.<sup>5</sup> For instance, the  
34 incidence of CHE for TB was 32.4% in Puducherry of India, 78.1% in Benin, and  
35 44% in Nigeria. <sup>11 16</sup> In China, more than two-thirds of TB-related households  
36 experienced CHE overall, and 46.7 % of the households still experienced CHE after  
37 reimbursement by the New Cooperative Medical Scheme (NCMS) in rural areas.<sup>17 18</sup>  
38 Additionally, households with members having TB are approximately 1.8 times more  
39 likely to suffer CHE than those without.<sup>19</sup> Therefore, it is essential to reduce the  
40 economic burden of patients with TB and save their families from CHE.

41  
42  
43  
44  
45  
46  
47  
48  
49  
50 To reduce the economic burden on patients with TB, a “free TB service policy”  
51 has been implemented in many countries.<sup>8 20 21</sup> Although the policy has been  
52 conducted for many years, patients with TB still suffer from the high costs of TB  
53 treatment, which often forces their families into catastrophe and poverty in low- and  
54 middle-income countries, such as in China, India, Peru, Ethiopia, and Tajikistan. <sup>16-18</sup>  
55  
56  
57  
58  
59  
60 <sup>22 23</sup> In China, the “free TB service policy” includes free X-ray examination and free



1  
2  
3  
4 sputum smear test for patients once with suspected TB at first visit, free first-line  
5 anti-TB drugs (6 months for new patients and 8 months if previously treated), three  
6 free sputum smear tests, and one free X-ray test during anti-TB treatment.<sup>18</sup> Also,  
7 there are three essential government-led complementary health insurances to cover  
8 some extra expenditures beyond the “free-TB service policy” in China, including the  
9 NCMS for rural farmers, the Medical Insurance for Urban Residents scheme (MIUR)  
10 and the Medical Insurance for Urban Employees (MIUE).<sup>18</sup> Health insurance is the  
11 least for rural farmers followed by that for local urban residents, while it for urban  
12 employees is the most. However, the financial protection remains insufficient though  
13 China has dramatically expanded health insurance coverage.<sup>19</sup>  
14  
15  
16  
17  
18  
19  
20  
21  
22  
23

24 According to a few studies conducted in China, Nigeria, Indonesia and Benin, the  
25 factors determining CHE for TB care include age, sex, number of family members,  
26 urban residence, educational level, being a breadwinner, job loss, health insurance  
27 status, poor households, adverse pre-diagnosis stage, treatment at a private facility,  
28 ratio of patient income to total household income, hospitalization, and previous of TB  
29 treatment.<sup>11 13 17 24</sup> However, the factors associated with CHE among patients with TB  
30 remain not well elucidated. Considering fact that delay in TB diagnosis was not only  
31 a significant challenge of TB control and prevention programs in low- and middle-  
32 income settings but also was an vital risk factor increases the risk of transmission and  
33 economic costs to patients and communities at large,<sup>25 26</sup> we planned to explore the  
34 associations between the patient and diagnostic delay and CHE for TB care. Also, the  
35 extent of CHE and other risk factors related to CHE are investigated as well.  
36 Consequently, a cross-sectional study was performed in Chongqing municipality,  
37 which was an economic and industrial hub of the southwest region of China with a  
38 heavy burden of TB.  
39  
40  
41  
42  
43  
44  
45  
46  
47  
48  
49  
50  
51  
52  
53  
54  
55  
56  
57  
58  
59  
60

## METHODS

### Study sites and participants

This cross-sectional study was conducted in four counties of Chongqing from March 2013 to August 2014. The TB epidemic was high in Chongqing, which ranked in the top 10 among the most upper TB burden provinces in China. The TB notification rate of Chongqing in 2015 had declined to 70.8 cases per 100,000 populations from the peak of 106 cases per 100,000 in 2005, but still above the average TB incidence of China. Recent years, approximately 20,000 patients were reported with TB in Chongqing, making up 2.5% of all notified TB cases in China.<sup>27</sup> There are 39 districts/counties in Chongqing. According to the Chongqing Statistical Yearbook 2015, the real GDP per capita was 47850 RMB. Urban population accounts for 59.6% of the total population. The four counties with similar levels of economic development and similar human geographical environment were selected as the study sites. These four counties are among the middle-income counties in Chongqing, have both villages and cities, and are in the process of urbanization. In Chongqing, the reimbursement ratio in different counties was different. The reimbursement ratio of medical expenses was 0-60% by MIUE, 0-50% by MIUR and 0-45% by NCMS for outpatients and 65% by MIUE, 35% by MIUR and 35% by NCMS for inpatients in Chongqing.

From March to December in 2013, all registered active pulmonary TB (PTB) patients excluding those aged below 16 years or with mental disorders were recruited consecutively in the designated TB medical institutes of the four counties. Because extrapulmonary TB, tuberculous pleuritis, drug-resistant pulmonary TB and patients with PTB not registered in counties' designated TB medical institutes were not covered by the free TB service policy during the period of research, only registered active pulmonary TB were included. Totally, 1290 patients with PTB were qualified, of who 61 refused to participate due to poor clinical conditions and 30 questionnaires were not completed. Thus, a total of 1199 patients were included in the study. All

1  
2  
3  
4 participants had access to free TB treatment and were prospectively followed  
5  
6 throughout the treatment period.  
7

## 8 **Data collection**

10  
11 All data were collected in these four counties' designated TB medical institutes. The  
12  
13 study was based on a well-structured questionnaire and patients' medical records. All  
14  
15 participants at the local TB-designated medical institutes were interviewed face to  
16  
17 face by a trained TB staff using the questionnaire. The following data were obtained:  
18  
19 covered personal information, socioeconomic information (age, sex, residence,  
20  
21 occupation, education, marital status, number of family members, household income,  
22  
23 etc.), and history of disease (forms of TB, date of first onset of suspected TB  
24  
25 symptoms, date of first visit to any health provider, date of PTB diagnosis, and direct  
26  
27 medical costs for TB care). Clinic information (patient delay, diagnostic delay, forms  
28  
29 of TB, health insurance status and hospitalization) and exact date of TB diagnosis  
30  
31 were checked against the patients' medical records. A 6-month or 8-month treatment  
32  
33 regimen was recommended by the WHO. The follow-up survey was conducted with  
34  
35 patients with TB till completion of the treatment. The treatment costs were collected  
36  
37 every month by the trained TB staff. The staff interviewed each participant and then  
38  
39 checked invoices or financial accounting systems to ensure accuracy. OOP payments  
40  
41 and reimbursements of the direct medical costs in different periods of services  
42  
43 (pre-diagnosis, diagnosis, and treatment) were collected per individual and checked  
44  
45 invoices or financial accounting systems as well. All costs were indicated in Ren Min  
46  
47 Bi (RMB).  
48

## 49 **Definitions**

51  
52 **Pulmonary TB** was diagnosed based on the pathological, clinical, and radiological  
53  
54 findings, and confirmed through bacteriological and histological examinations, which  
55  
56 were strictly performed according to the Chinese Diagnostic criteria for PTB  
57  
58 (WS-288-2008) .<sup>28</sup>  
59  
60

1  
2  
3  
4 **Patient delay** is determined as a time interval from the first onset of TB symptoms to  
5 the first visit to any health provider; if the time interval lasts for more than 14 days, it  
6 is considered as a “delay”.<sup>29</sup>  
7  
8

9  
10 **Diagnostic delay** is defined as a time interval between a patient’s first visit to any  
11 health provider and the final diagnosis as TB; if the time interval lasts for more than  
12 14 days, it is considered as a “delay”.<sup>29</sup>  
13  
14

15  
16 **Pre-diagnosis** is the period from the onset of TB symptoms to the first visit to a local  
17 designated TB medical institution. **The period of diagnosis** is from the first visit to a  
18 local designated TB medical institution to the diagnosis of TB. **The period of**  
19 **treatment** is the full course of TB treatment.  
20  
21  
22  
23

24  
25 **Direct medical costs** are composed of consultation fees, laboratory tests, X-rays,  
26 medical tests, and drugs during the period of pre-diagnosis, diagnosis, and treatment.  
27  
28

29  
30 **OOP payments** are regarded as the direct medical costs paid by patients themselves.  
31  
32

### 33 **Measuring the incidence and intensity of catastrophic health expenditure**

34

35  
36 CHE is usually assessed by incidence and intensity. According to the definition of  
37 CHE in several previous studies<sup>11 13 14</sup>, we defined ‘catastrophic’ as the OOP  
38 payments of total medical costs for TB care exceeding 10% of the annual household  
39 income in this study. Head count (HC) is used to measure the incidence of CHE,  
40 while the mean gap (MG) and mean positive gap (MPG) are used to reflect the  
41 intensity of CHE. HC means the percentage of households whose OOP payments  
42 equal or exceed 10% of their annual income to the total number of households. MG is  
43 the average amount by which OOP payments, as a proportion of annual household  
44 income, exceeds the threshold. MPG is equal to  $MG/HC$ , the excess expenditure per  
45 household experiencing CHE. The methods used in measuring HC, MG, and MPG  
46 are based on the previous study.<sup>14</sup>  
47  
48  
49  
50  
51  
52  
53  
54  
55  
56

### 57 **Statistical analysis**

58  
59  
60

1  
2  
3  
4 Data were double entered and checked using EPI Data Version 3. Data analysis was  
5 performed using Statistical Package for the Social Sciences (SPSS) Version 18.0  
6 (SPSS Inc. Chicago, IL, USA). Continuous variables were presented as medians and  
7 interquartile (IQR) ranges, while categorical variables were presented as numbers and  
8 percentages (%). Pearson's chi-square test was used in univariate analyses to identify  
9 factors associated with the CHE and odds ratios with 95% confidence intervals (95%  
10 CIs) were computed. All variables with a *P*-value <0.05 in the univariate analysis  
11 were included in the multivariate model. A multivariate logistic regression model  
12 using a backward elimination method was used to assess the determinants of CHE  
13 and to calculate adjusted odds ratios (aOR) and 95% CIs. A two-sided *P*-value of  
14 <0.05 was considered statistically significant.  
15  
16  
17  
18  
19  
20  
21  
22  
23  
24  
25

### 26 **Ethics approval**

27  
28 The study was approved by the Ethical Committee of the Chongqing Institute of  
29 Tuberculosis Prevention and Treatment, Chongqing, China. Written informed  
30 consent was obtained from each participant prior to inclusion in the survey.  
31  
32  
33  
34

### 35 **Patient and public involvement**

36  
37 Patients and the public were not involved in the design or planning of the study.  
38  
39  
40

## 41 **RESULTS**

### 42 **Patient characteristics**

43  
44 The characteristics of these patients with PTB are summarized in Table 1. A total of  
45 1199 patients with PTB were enrolled in the study. The proportion of men to women  
46 involved in this study is 2.3:1. More than three-quarters of patients were in their labor  
47 age (16–59 years), and the average age of the patients was 43.9 years, with a median  
48 age of 44 years. Approximately 30% of patients were migrants. Two-thirds of  
49 patients were married and received at least junior high school education. About  
50 one-quarter of patients were unemployed, about 30% patients were peasants and  
51  
52  
53  
54  
55  
56  
57  
58  
59  
60

1  
2  
3  
4 8.0% patients were students. Approximately three-quarters of the households had one  
5 to three family members. In the majority, 89.2% of the patients had health insurance  
6 and about half of the patients had NCMS. Only 15.9% of patients had been  
7 hospitalized in the intensive period. Approximately three-quarters of patients were  
8 smearing negative. Of the total participants, 53.0% and 43.0% patients experienced  
9 patient and diagnostic delay, with a median (IQR) of 16(3-52) and 9 (3-33) days  
10 measured in days, respectively. Patients' average annual household income was  
11 42,200 RMB, with a median (IQR) of 35,000 RMB (20,000–56,000 RMB).  
12  
13  
14  
15  
16  
17  
18  
19

### 20 **Direct medical costs for TB in different periods of medical treatment**

21  
22  
23 The OOP costs and health insurance reimbursement during the pre-diagnosis,  
24 diagnosis, and treatment period are presented in Table 2. Expenses in the  
25 pre-diagnosis period were all paid by OOP, accounting for nearly half of the total  
26 cost. Excluding the fees covered by free TB service policy, around 7% of costs were  
27 reimbursed by health insurance during the treatment period, but no costs were  
28 reimbursed during the period of pre-diagnosis and diagnosis. The median total direct  
29 medical costs paid by a TB patient were 4085 RMB, about 93% of which was paid by  
30 patients themselves.  
31  
32  
33  
34  
35  
36  
37  
38

### 39 **Incidence and intensity of CHE**

40  
41  
42 Table 3 shows that 52.8% (633/1199) of all TB-related households experienced CHE.  
43 On average, healthcare payments for TB were 18.1% higher than the threshold value  
44 (10%). For households experiencing CHE, the mean positive gap was 34.2% higher  
45 than the threshold. The incidence of CHE in patients experiencing patient delay or  
46 diagnostic delay was 11% or 9.7% more than those not suffering patient delay or  
47 diagnostic delay, respectively. The intensity measure was also higher for the group of  
48 experiencing patient delay or diagnostic delay than the group without delay.  
49  
50  
51  
52  
53  
54  
55

### 56 **Determinants of CHE**

57  
58  
59 Table 4 shows the influence of different variables on CHE for TB care using a  
60

1  
2  
3  
4 Pearson's chi-square test. There are many factors associated with CHE, including  
5 patient delay, diagnostic delay, sex, age, resident status, marital status, educational  
6 level, occupation, health insurance status, and hospitalization. Those factors were  
7 included in the multivariate logistic regression.  
8  
9  
10

11  
12 Logistic regression produced a wide range of determinants related to catastrophic  
13 health expenditure (Table 5). Independent determinants of CHE were: patient delay  
14 (aOR, 1.342; 95% confidence interval (CI), 1.043–1.726), diagnostic delay (aOR,  
15 1.540; 95% CI, 1.195–1.983), male (aOR, 1.141; 95% CI, 1.066–1.877), age $\geq$ 60  
16 years (aOR, 2.117; 95% CI, 1.281–3.498), inhabitant (aOR, 1.455; 95% CI, 1.084–  
17 1.951), divorced or a widow (aOR, 2.211; 95% CI, 1.093–4.475), peasant (aOR,  
18 2.205; 95% CI, 1.522–3.194), high school and above (aOR, 0.542; 95% CI, 0.356–  
19 0.826) and as NCMS membership (aOR, 1.688; 95% CI, 1.071–2.661). However,  
20 hospitalization was not related to CHE after controlling for other variables (aOR,  
21 1.342; 95% CI, 0.950–1.897).  
22  
23  
24  
25  
26  
27  
28  
29  
30  
31  
32  
33  
34  
35  
36  
37  
38  
39  
40  
41  
42  
43  
44  
45  
46  
47  
48  
49  
50  
51  
52  
53  
54  
55  
56  
57  
58  
59  
60

## DISCUSSION

For the first time, global TB targets aimed to decrease catastrophic costs associated with TB. Evaluating the incidence and intensity of TB-related CHE not only provided insight into the universal health coverage (UHC) but also reflected the economic burden of patients with TB and their families. In this study, the incidence of CHE for TB care was 52.8% after reimbursement, which was lower than the reported rates of 66.8%, 65% and 78.1% in other cities of China, Nigeria, and Benin, respectively, using the same CHE measurement methods.<sup>11 13 17</sup> However, the figure was a little higher than that in Indonesia (50%) when they involved in patients with MDR-TB,<sup>24</sup> and much higher than the rate of CHE incurred by general population or patients with non-communicable chronic disease in China.<sup>19</sup> In that TB inequitably affects poor people and households in poorer economic quintiles are more at risk of suffering CHE and impoverishment.<sup>19 30</sup> The mean gap was 18.1% and the mean positive gap was 34.2% for TB in our study, both were higher than that in Nigeria (6.0%, 9.3%)<sup>11 13</sup> and in Benin (7.8%,14.8%)<sup>13</sup> but lower than that in other cities of China (40.8%, 62.2%)<sup>17</sup> because we did not take non-medical costs into account while other studies did. Although many studies claimed that non-medical costs and indirect costs related to TB care were a severe financial burden for patients with TB and their households,<sup>5 31 32</sup> some studies found that these costs were not high compared with direct medical costs.<sup>18 33 34</sup> Thus, the extent of patients incurring catastrophic costs in this study population may be underestimated but remain reliable.

Although all patients in this study have access to free TB treatment and the majority of them have health insurance, they had a heavy financial burden of out-of-pocket payments and more than half of them incurred catastrophic costs. The phenomena is common in China,<sup>8 18 35</sup> there may be three reasons to explain it: (i) Many associated health-care costs are not covered in the free TB policy, for example, payment for drugs of ancillary and liver protection, and extra diagnostic tests.<sup>2 8 36</sup> (ii) Driven by profits, doctors may prescribe additional medicines and tests.<sup>37</sup> (iii) The reimbursement ratio for outpatient services is low and often ignored, as well as the



1  
2  
3  
4 actual implementation strength of inpatients reimbursement was weak.<sup>38-40</sup> Besides,  
5 we also found nearly half of all OOP payments were paid before diagnosis, which  
6 was similar to many previous studies.<sup>6 23 41</sup> This cost had aroused particular concern  
7 in that it not only reflected the economic burden on families for obtaining a  
8 diagnosis, but also may act as an obstacle for poor patients to access timely TB care.  
9  
10  
11  
12  
13

14 Delay in diagnosis had a massive impact on TB transmission in the community,  
15 aggravating the severity and mortality, resulting in an unfavorable treatment outcome  
16 and significantly increasing total patient costs.<sup>42-45</sup> This study, we further investigated  
17 the relationship between patient/diagnostic delay and CHE for TB care among  
18 patients with TB. We found about half patients encountered patient delay or  
19 diagnostic delay, who incurred more serious CHE than those without delay. Also, we  
20 demonstrated that patient delay and diagnostic delay were crucial determinants of  
21 CHE. Consistently, Laokri et al found that patient delay over 1 month was an  
22 independent determinant of incurring catastrophic expenditure.<sup>11</sup> In addition, a large  
23 number of studies had revealed that patient delay and diagnostic delay were  
24 independent factors associated with total out-of-pocket costs.<sup>23 25 34 35 46</sup> Actually,  
25 prolonged delays in TB diagnosis are still prevailing problems in many countries in  
26 many low- and middle-income countries, such as in Ethiopia, Zambia, Tanzania,  
27 Mozambique, Indonesia and so on.<sup>43 47-50</sup> Therefore, it is vital to take measures to  
28 shorten the delay in diagnosis.  
29  
30  
31  
32  
33  
34  
35  
36  
37  
38  
39  
40  
41  
42  
43

44 Patient delay may be related to the fact that patients do not take minor symptoms  
45 seriously in its early stage and will pay greater attention to it until symptoms become  
46 more severe.<sup>38</sup> In addition, many sociodemographic and economic factors contribute  
47 to patient delay.<sup>29</sup> Therefore, we should adopt comprehensive measures to facilitate  
48 patients to seek care early, such as strengthening TB health education to the public  
49 and adopting a precise poverty alleviation to increase the income of poverty-stricken  
50 patients. Early diagnosis is difficult due to the vast percentage of asymptomatic PTB  
51 patients and non-availability of rapid, accurate, and cost-effective tests in many  
52 settings.<sup>51</sup> In this study, only one-quarter of patients has been confirmed  
53  
54  
55  
56  
57  
58  
59  
60

1  
2  
3  
4 bacteriological and mainly based on traditional methods. Rapid molecular methods  
5 were not frequently used in Chongqing in 2013. Hence, more rapid, accurate, and  
6 affordable methods are urgently needed to shorten the time of diagnosis.  
7  
8

9  
10 Multivariate regression analysis indicated that demographic factors such as age,  
11 sex, marital status, occupation, resident status, and education level independently  
12 affected the risk of catastrophic costs for TB care. Consistent with previous studies in  
13 Nigeria and other cities of China, age was an essential determinant of CHE,<sup>11 17</sup> but  
14 only patients who were  $\geq 60$  years significantly affect CHE after removing the  
15 confounding factors in our study. Usually, men were the breadwinner of a family,  
16 thus we and Ukwaja et al found male patients were more easily to experience CHE,<sup>11</sup>  
17 but Zhou et al showed that gender had no significant associations with CHE.<sup>17</sup> In  
18 contrast with a previous study in China,<sup>17</sup> we found marital status was an  
19 independent factor related with CHE, but the family size and hospitalization were not  
20 determinants of CHE because we grouped different segments of the household  
21 population. Besides, only 15.9% of patients had been hospitalized during the  
22 treatment, much lower than the figure in a previous study of 55%.<sup>17</sup> Generally,  
23 people with low educational level also have less economic income, and thus we all  
24 demonstrated patients with less education were more likely to incur CHE.<sup>11 13</sup>  
25 Compared with inhabitants, migrants had a smaller proportion of patients being male,  
26 elderly, or peasant and a higher proportion of patients with high educational level,  
27 thus migrant patients were less likely to experience CHE compared with inhabitant  
28 patients.  
29  
30  
31  
32  
33  
34  
35  
36  
37  
38  
39  
40  
41  
42  
43  
44  
45  
46  
47

48 We found that patients covered by NCMS, compared with those without any type  
49 of health insurance, were more likely to experience CHE. A series of studies  
50 conducted in China have demonstrated that NCMS could not relieve the financial  
51 burden of TB-related medical costs and had a partial effect on protecting TB-related  
52 households from CHE.<sup>17 39 52</sup> Compared with patients not covered by NCMS,  
53 patients with TB covered by the NCMS only had a 5% higher reimbursement rate  
54 regarding outpatient and total medical costs in Zhejiang and Sichuan provinces of  
55  
56  
57  
58  
59  
60

1  
2  
3  
4 China.<sup>39</sup> NCMS is designed exclusively for rural residents particular for peasants,  
5 who are usually in low-income status. Also, the majority of patients without health  
6 insurance were migrants. In contrast with the previous study in China, we did not  
7 find MIUR or MIUE has any positive effect on reducing CHE.<sup>17</sup> It may be due to the  
8 actual reimbursement rate of health insurance is low in China. These three types of  
9 health insurances largely cover inpatient services but the benefit package for  
10 outpatient care vary widely. In fact, a lot of areas existed to ignore reimbursements to  
11 varying degrees in China, especially for outpatient services.<sup>40</sup> In research, there was  
12 no reimbursement for medical costs during pre-diagnosis and diagnosis, which  
13 further indicated that the actual reimbursement rate is very low. Thus, so far health  
14 insurance plan did not actually help to relieve the financial burden for patients with  
15 TB in China. Consequently, the health insurance policy should be implemented  
16 effectively.  
17  
18  
19  
20  
21  
22  
23  
24  
25  
26  
27  
28  
29

30 This study has some limitations. Firstly, some data collected based on  
31 self-reporting could not be checked, which may be subjected to recall bias. Secondly,  
32 the data in this study were collected four years ago, and the per capita income has  
33 increased from 2014 to 2017. However, China's free TB service policy has not  
34 changed in recent years, and TB inequitably affects poor people. Therefore, the CHE  
35 remains a problem for TB now in China. Thirdly, we did not use the new definition  
36 of "catastrophic costs due to TB" recommended by WHO, which is the total [direct  
37 and indirect] costs exceeding 20% of annual household income recently.<sup>15</sup> Although  
38 the threshold (10%) we set was lower than the new definition and we did not take  
39 indirect costs into account, it may also be valuable to present the proportion of  
40 TB-affected patients (and their households) facing catastrophic costs if direct costs  
41 alone are counted.<sup>15</sup> Furthermore, the data about the CHE associated with TB were  
42 limited worldwide and correlational research has been conducted only in three cities  
43 in China. Consequently, our study may add some new data of CHE for TB care in  
44 China.  
45  
46  
47  
48  
49  
50  
51  
52  
53  
54  
55  
56  
57  
58  
59  
60

## CONCLUSION

1  
2  
3  
4 Although all patients have access to free TB service policy and the majority of them  
5 have health insurance, patients with TB still shoulder a high burden of OOP  
6 payments and experience high incidence and intensity of CHE for TB care in  
7 Chongqing, China. Except for social-demographic factors, patient delay and  
8 diagnostic delay are essential determinants of CHE for TB care, which highlights the  
9 significance of early care seeking and early diagnosis. In addition, NCMS aggravates  
10 the catastrophic costs, which implicates that it is essential to improve the actual  
11 reimbursement rates of health insurance, especially for outpatients. Furthermore,  
12 more fine-tuned interventions such as precise poverty alleviation are essential to  
13 taken for vulnerable patients with TB to reduce their catastrophic costs. Overall, our  
14 results have provided some baseline data about CHE for TB, which may give some  
15 clues for a further prospective study.  
16  
17  
18  
19  
20  
21  
22  
23  
24  
25  
26  
27  
28  
29  
30

31 **Acknowledgments** We thank the participants who have generously devoted their  
32 time and the staff in the study sites where this work has been conducted for their  
33 support in making this work done. Great thanks to professor Bradley Chen from  
34 National Yang-Ming University of Taiwan and professor Chen-Yuan Chiang from  
35 International Union against Tuberculosis and Lung Disease for their professional  
36 suggestions in manuscript writing.  
37  
38  
39  
40  
41  
42

43 **Contributors** DH: designed the study and drafted the manuscript; YL: designed the  
44 study, implemented the survey and analyzed the data; WD: designed the study,  
45 analyzed the data and drafted the manuscript; WZ, CW, QW, and YY: implemented  
46 the survey and collected data; HL: analyzed the data and drafted the manuscript. All  
47 authors read and approved the final version of the manuscript.  
48  
49  
50  
51  
52

53 **Funding** This work was supported by the research funding from Chongqing  
54 Municipal Health Bureau (No.2012-1-087, 2017MSXM124, and 2017MSXM125).  
55  
56  
57

58 **Competing interests** None  
59  
60

1  
2  
3  
4 **Patient consent** Obtained  
5

6 **Ethics approval** The Ethical Committee of Chongqing Institute of Tuberculosis  
7  
8 Prevention and Treatment, Chongqing, China.  
9

10  
11 **Provenance and peer review** Not commissioned; externally peer reviewed  
12

13  
14 **Data sharing statement** Data are available upon request.  
15  
16  
17  
18  
19  
20  
21  
22  
23  
24  
25  
26  
27  
28  
29  
30  
31  
32  
33  
34  
35  
36  
37  
38  
39  
40  
41  
42  
43  
44  
45  
46  
47  
48  
49  
50  
51  
52  
53  
54  
55  
56  
57  
58  
59  
60

For peer review only

## REFERENCES

1. World Health Organization. Global tuberculosis report 2018. World Health Organization, Geneva, France, WHO/CDS/TB/2018:20.
2. Jackson S, Sleight AC, Wang GJ, Liu XL. Poverty and the economic effects of TB in rural China. *Int J Tuberc Lung Dis* 2006;10:1104-1110.
3. World Health Organization. The end TB strategy. Geneva, Switzerland; 2014.
4. Diel R, Vandeputte J, de Vries G, Stillo J, Wanlin M, Nienhaus A. Costs of tuberculosis disease in the European Union: a systematic analysis and cost calculation. *Eur Respir J* 2014;43:554-565.
5. Tanimura T, Jaramillo E, Weil D, Raviglione M, Lönnroth K. Financial burden for tuberculosis patients in low- and middle-income countries: a systematic review. *Eur Respir J* 2014;43:1763-1775.
6. Ukwaja KN, Modebe O, Igwenyi C, Alobu I. The economic burden of tuberculosis care for patients and households in Africa: a systematic review. *Int J Tuberc Lung Dis* 2012;16:733-739.
7. Laurence YV, Griffiths UK, Vassall A. Costs to Health Services and the Patient of Treating Tuberculosis: A Systematic Literature Review. *Pharmacoeconomics* 2015;33:939-955.
8. Long Q, Smith H, Zhang T, Tang S, Garner P. Patient medical costs for tuberculosis treatment and impact on adherence in China: a systematic review. *BMC Public Health* 2011;11:393.
9. Choi JW, Choi JW, Kim JH, Yoo KB, Park EC. Association between chronic disease and catastrophic health expenditure in Korea. *BMC Health Serv Res* 2015;15:26.
10. Xu K, Evans DB, Kawabata K, Zeramdini R, Klavus J, Murray CJ. Household catastrophic health expenditure: a multicountry analysis. *Lancet* 2003;362:111-117.
11. Ukwaja KN, Alobu I, Abimbola S, Hopewell PC. Household catastrophic payments for tuberculosis care in Nigeria: incidence, determinants, and policy implications for universal health coverage. *Infect Dis Poverty* 2013;2:21.
12. Pal R. Measuring incidence of catastrophic out-of-pocket health expenditure: with application to India. *Int*

- 1  
2  
3  
4 *J Health Care Finance Econ* 2012;12:63-85.
- 5  
6  
7 13. Laokri S, Dramaix-Wilmet M, Kassa F, Anagonou S, Dujardin B. Assessing the economic burden of  
8 illness for tuberculosis patients in Benin: determinants and consequences of catastrophic health  
9 expenditures and inequities. *Trop Med Int Health* 2014;19:1249-1258.
- 10  
11  
12  
13 14. Wagstaff A, van Doorslaer E. Catastrophe and impoverishment in paying for health care: with applications  
14 to Vietnam 1993-1998. *Health Econ* 2003;12:921-934.
- 15  
16  
17  
18 15. Tuberculosis patient cost surveys: a hand book. Geneva: World Health Organization; 2017.  
19 License: CC BY-NC-SA 3.0 IGO.
- 20  
21  
22  
23 16. Prasanna T, Jayashree K, Chinnakali P, Bahurupi Y, Vasudevan K, Das M. Catastrophic costs of  
24 tuberculosis care: a mixed methods study from Puducherry, India. *Glob Health Action* 2018;11:1477493.
- 25  
26  
27  
28 17. Zhou C, Long Q, Chen J, Xiang L, Li Q, Tang S, Huang F, Sun Q, Lucas H. Factors that determine  
29 catastrophic expenditure for tuberculosis care: a patient survey in China. *Infect Dis Poverty* 2016;5:6.
- 30  
31  
32  
33 18. Chen S, Zhang H, Pan Y, Long Q, Xiang L, Yao L, Lucas H. Are free anti-tuberculosis drugs enough? An  
34 empirical study from three cities in China. *Infect Dis Poverty* 2015;4:47.
- 35  
36  
37  
38 19. Li Y, Wu Q, Xu L, Legge D, Hao Y, Gao L, Ning N, Wan G. Factors affecting catastrophic health  
39 expenditure and impoverishment from medical expenses in China: policy implications of universal health  
40 insurance. *Bull World Health Organ* 2012;90:664-671.
- 41  
42  
43  
44 20. Holtgrave DR, Crosby RA. Social determinants of tuberculosis case rates in the United States. *Am J Prev*  
45 *Med* 2004;26:159-162.
- 46  
47  
48  
49 21. Mauch V, Bonsu F, Gyapong M, Awini E, Suarez P, Marcelino B, Melgen RE, Lönnroth K, Nhung NV,  
50 Hoa NB, Klinkenberg E. Free tuberculosis diagnosis and treatment are not enough: patient cost evidence  
51 from three continents. *Int J Tuberc Lung Dis* 2013;17:381-387.
- 52  
53  
54  
55 22. Wingfield T, Boccia D, Tovar M, Gavino A, Zevallos K, Montoya R, Lönnroth K, Evans CA. Defining  
56 catastrophic costs and comparing their importance for adverse tuberculosis outcome with multi-drug  
57 resistance: a prospective cohort study, Peru. *PLoS Med* 2014;11:e1001675.
- 58  
59  
60

- 1  
2  
3  
4 23. Asres A, Jerene D, Deressa W. Pre- and post-diagnosis costs of tuberculosis to patients on Directly  
5 Observed Treatment Short course in districts of southwestern Ethiopia: a longitudinal study. *J Health*  
6 *Popul Nutr* 2018;37:15.  
7  
8  
9  
10 24. Fuady A, TAJ H, Mansyur M, Richardus JH. Catastrophic total costs in tuberculosis-affected households  
11 and their determinants since Indonesia's implementation of universal health coverage. *Infect Dis Poverty*  
12 2018;7:3.  
13  
14  
15  
16  
17 25. Mesfin MM, Newell JN, Madeley RJ, Mirzoev TN, Tareke IG, Kifle YT, Gessesew A, Walley JD. Cost  
18 implications of delays to tuberculosis diagnosis among pulmonary tuberculosis patients in Ethiopia. *BMC*  
19 *Public Health* 2010;10:173.  
20  
21  
22  
23  
24 26. Getnet F, Demissie M, Assefa N, Mengistie B, Worku A. Delay in diagnosis of pulmonary tuberculosis in  
25 low-and middle-income settings: systematic review and meta-analysis. *BMC Pulm Med* 2017;17:202.  
26  
27  
28 27. Wu B, Yu Y, Xie W, Liu Y, Zhang Y, Hu D, Li Y. Epidemiology of tuberculosis in Chongqing, China: a  
29 secular trend from 1992 to 2015. *Sci Rep* 2017;7:7832.  
30  
31  
32  
33 28. WS-288-2008. Diagnostic criteria for pulmonary tuberculosis. Ministry of health of the People's Republic of  
34 China, 2008.  
35  
36  
37  
38 29. Li Y, Ehiri J, Tang S, Li D, Bian Y, Lin H, Marshall C, Cao J. Factors associated with patient, and  
39 diagnostic delays in Chinese TB patients: a systematic review and meta-analysis. *BMC Med* 2013;11:156.  
40  
41  
42  
43 30. Rocha C, Montoya R, Zevallos K, Curatola A, Ynga W, Franco J, Fernandez F, Becerra N, Sabaduche M,  
44 Tovar MA, Ramos E, Tapley A, Allen NR, Onifade DA, Acosta CD, Maritz M, Concha DF, Schumacher  
45 SG, Evans CA. The Innovative Socio-economic Interventions Against Tuberculosis (ISIAT) project: an  
46 operational assessment. *Int J Tuberc Lung Dis* 2011;15 Suppl 2:50-57.  
47  
48  
49  
50  
51 31. Li Q, Jiang W, Wang Q, Shen Y, Gao J, Sato KD, Long Q, Lucas H. Non-medical financial burden in  
52 tuberculosis care: a cross-sectional survey in rural China. *Infect Dis Poverty* 2016;5:5.  
53  
54  
55  
56 32. da SAR, Pinto M, Trajman A. Patient costs for the diagnosis of tuberculosis in Brazil: comparison of  
57 Xpert MTB/RIF and smear microscopy. *Int J Tuberc Lung Dis* 2014;18:547-551.  
58  
59  
60



- 1  
2  
3  
4 33. Bay V, Tabarsi P, Rezapour A, Marzban S, Zarei E. Cost of Tuberculosis Treatment: Evidence from Iran's  
5 Health System. *Osong Public Health Res Perspect* 2017;8:351-357.  
6  
7  
8 34. Pan HQ, Bele S, Feng Y, Qiu SS, Lü JQ, Tang SW, Shen HB, Wang JM, Zhu LM. Analysis of the  
9 economic burden of diagnosis and treatment of tuberculosis patients in rural China. *Int J Tuberc Lung Dis*  
10 2013;17:1575-1580.  
11  
12  
13  
14  
15 35. Qiu S, Pan H, Zhang S, Peng X, Zheng X, Xu G, Wang M, Wang J, Lu H. Is tuberculosis treatment really  
16 free in China? A study comparing two areas with different management models. *PLoS One*  
17 2015;10:e0126770.  
18  
19  
20  
21  
22 36. Liu Q, Smith H, Wang Y, Tang S, Wang Q, Garner P. Tuberculosis patient expenditure on drugs and tests  
23 in subsidised, public services in China: a descriptive study. *Trop Med Int Health* 2010;15:26-32.  
24  
25  
26 37. Zhan S, Wang L, Yin A, Blas E. Revenue-driven in TB control--three cases in China. *Int J Health Plann*  
27 *Manage* 2004;19 Suppl 1: S63-78.  
28  
29  
30  
31 38. Zhang T, Tang S, Jun G, Whitehead M. Persistent problems of access to appropriate, affordable TB  
32 services in rural China: experiences of different socio-economic groups. *BMC Public Health* 2007;7:19.  
33  
34  
35  
36 39. Wei X, Zou G, Yin J, Walley J, Zhang X, Li R, Sun Q. Effective reimbursement rates of the rural health  
37 insurance among uncomplicated tuberculosis patients in China. *Trop Med Int Health* 2015;20:304-311.  
38  
39  
40  
41 40. Li W, Li X, Zhang H, Li R, Cheng J, Wang L. An investigation of the current health insurance status of  
42 pulmonary tuberculosis cases without drug resistance in certain areas of China. *Chin Prev Med (in*  
43 *Chinese)* 2012;13(6):401-5.  
44  
45  
46  
47 41. Ayé R, Wyss K, Abdualimova H, Saidaliev S. Household costs of illness during different phases of  
48 tuberculosis treatment in Central Asia: a patient survey in Tajikistan. *BMC Public Health* 2010;10:18.  
49  
50  
51  
52 42. Harris TG, Sullivan MJ, Proops D. Delay in diagnosis leading to nosocomial transmission of tuberculosis  
53 at a New York City health care facility. *Am J Infect Control* 2013;41:155-160.  
54  
55  
56  
57 43. Mahato RK, Laohasiriwong W, Vaeteewootacharn K, Koju R, Bhattarai R. Major Delays in the Diagnosis  
58 and Management of Tuberculosis Patients in Nepal. *J Clin Diagn Res* 2015;9:LC05-09.  
59  
60

- 1  
2  
3  
4 44. Kuznetsov VN, Grjibovski AM, Mariandyshev AO, Johansson E, Bjune GA. Two vicious circles  
5 contributing to a diagnostic delay for tuberculosis patients in Arkhangelsk. *Emerg Health Threats J*  
6 2014;7:24909.  
7  
8  
9  
10 45. Lui G, Wong RY, Li F, Lee MK, Lai RW, Li TC, Kam JK, Lee N. High mortality in adults hospitalized  
11 for active tuberculosis in a low HIV prevalence setting. *PLoS One* 2014;9:e92077.  
12  
13  
14 46. Aspler A, Menzies D, Oxlade O, Banda J, Mwenge L, Godfrey-Faussett P, Ayles H. Cost of tuberculosis  
15 diagnosis and treatment from the patient perspective in Lusaka, Zambia. *Int J Tuberc Lung Dis*  
16 2008;12:928-935.  
17  
18  
19 47. Storla DG, Yimer S, Bjune GA. A systematic review of delay in the diagnosis and treatment of  
20 tuberculosis. *BMC Public Health* 2008;8:15.  
21  
22  
23 48. Fuge TG, Bawore SG, Solomon DW, Hegana TY. Patient delay in seeking tuberculosis diagnosis and  
24 associated factors in Hadiya Zone, Southern Ethiopia. *BMC Res Notes* 2018;11:115.  
25  
26  
27 49. Said K, Hella J, Mhalu G, Chiryankubi M, Masika E, Maroa T, Mhimbira F, Kapalata N, Fenner L.  
28 Diagnostic delay and associated factors among patients with pulmonary tuberculosis in Dar es Salaam,  
29 Tanzania. *Infect Dis Poverty* 2017;6:64.  
30  
31  
32 50. Needham DM, Foster SD, Tomlinson G, Godfrey-Faussett P. Socio-economic, gender and health services  
33 factors affecting diagnostic delay for tuberculosis patients in urban Zambia. *Trop Med Int Health*  
34 2001;6:256-259.  
35  
36  
37 51. Xu W, Lu W, Zhou Y, Zhu L, Shen H, Wang J. Adherence to anti-tuberculosis treatment among  
38 pulmonary tuberculosis patients: a qualitative and quantitative study. *BMC Health Serv Res* 2009;9:169.  
39  
40  
41 52. Xiang L, Pan Y, Hou S, Zhang H, Sato KD, Li Q, Wang J, Tang S. The impact of the new cooperative  
42 medical scheme on financial burden of tuberculosis patients: evidence from six counties in China. *Infect*  
43  
44  
45  
46  
47  
48  
49  
50  
51  
52  
53  
54  
55  
56  
57  
58  
59  
60

1  
2  
3  
4  
5  
6  
7  
8  
9  
10  
11  
12  
13  
14  
15  
16  
17  
18  
19  
20  
21  
22  
23  
24  
25  
26  
27  
28  
29  
30  
31  
32  
33  
34  
35  
36  
37  
38  
39  
40  
41  
42  
43  
44  
45  
46  
47  
48  
49  
50  
51  
52  
53  
54  
55  
56  
57  
58  
59  
60

For peer review only

**Table 1 Social-demographic and clinical characteristics of the study participants (n=1199).**

| Variables                 | Patients No. | Percent (%) |
|---------------------------|--------------|-------------|
| <b>Sex</b>                |              |             |
| Male                      | 839          | 70.0        |
| Female                    | 360          | 30.0        |
| <b>Age</b>                |              |             |
| ≤40                       | 532          | 44.4        |
| 41-59                     | 402          | 33.5        |
| ≥60                       | 265          | 22.1        |
| <b>Residential status</b> |              |             |
| Inhabitant                | 848          | 70.7        |
| Migrant                   | 351          | 29.3        |
| <b>Marital status</b>     |              |             |
| Single                    | 340          | 28.4        |
| Married                   | 795          | 66.3        |
| Divorced/widow            | 64           | 5.3         |
| <b>Educational level</b>  |              |             |
| Primary or below          | 382          | 31.9        |
| Junior high               | 356          | 29.7        |

|                                |                       |      |      |
|--------------------------------|-----------------------|------|------|
|                                | High school and above | 461  | 38.4 |
| <b>Occupation</b>              |                       |      |      |
|                                | Unemployed            | 302  | 25.2 |
|                                | Employed              | 327  | 27.3 |
|                                | Peasant               | 353  | 29.4 |
|                                | Student               | 96   | 8.0  |
|                                | Retiree               | 121  | 10.1 |
| <b>Family size</b>             |                       |      |      |
|                                | 1~3                   | 887  | 74.0 |
|                                | 4~8                   | 312  | 26.0 |
| <b>Health insurance status</b> |                       |      |      |
|                                | None                  | 130  | 10.8 |
|                                | NCMS                  | 548  | 45.7 |
|                                | MIUR                  | 230  | 19.2 |
|                                | MIUE                  | 249  | 20.8 |
|                                | Other insurance plan  | 42   | 3.5  |
| <b>Hospitalization</b>         |                       |      |      |
|                                | Yes                   | 191  | 15.9 |
|                                | No                    | 1008 | 84.1 |

**Forms of TB**

|                    |     |      |
|--------------------|-----|------|
| Smear-negative PTB | 892 | 74.4 |
| Smear-positive PTB | 307 | 25.6 |

**Patient delay**

|                     |           |      |
|---------------------|-----------|------|
| Yes                 | 635       | 53.0 |
| No                  | 564       | 47.0 |
| Median (IQR) (days) | 16 (3-52) |      |

**Diagnostic delay**

|                     |          |      |
|---------------------|----------|------|
| Yes                 | 516      | 43.0 |
| No                  | 683      | 57.0 |
| Median (IQR) (days) | 9 (3-33) |      |

**Household annual income(RMB)**

|                     |                       |  |
|---------------------|-----------------------|--|
| Mean                | 42,200                |  |
| Median (IQR) (days) | 35,000(20,000-56,000) |  |

---

Note: IQR represents interquartile range. TB represents tuberculosis.

NCMS, New Cooperative Medical Scheme; MIUR, Medical Insurance for Urban Residents; MIUE, Medical Insurance for Urban Employees.

**Table 2 Direct medical costs for TB care in different periods of services (n=1199). RMB**

| Costs in different periods<br>(services) | Out-of-pockets |           | Health insurance reimbursement |       | Total  |           |
|------------------------------------------|----------------|-----------|--------------------------------|-------|--------|-----------|
|                                          | Median         | IQR       | Median                         | IQR   | Median | IQR       |
| Pre-diagnosis                            | 750            | 250-3000  | 0                              | 0     | 750    | 250-3000  |
| Diagnosis*                               | 157            | 121-250   | 0                              | 0     | 157    | 121-250   |
| Treatment #                              | 1792           | 834-3050  | 0                              | 0-501 | 1966   | 1000-3723 |
| Total                                    | 3789           | 2106-6645 | 0                              | 0-501 | 4085   | 2222-7371 |

Note: Expenses excludes the costs of the free-TB policy reduction and exemption. \*The expenses excluded the cost of one-time free chest X-ray and sputum smear examination. #The expenses excluded anti-TB drugs (6 months for new patients, 8 months if previously treated ), three times sputum smear tests and one time X-ray test during anti-TB treatment. IQR: interquartile range.

**Table 3 Incidence and intensity of CHE for TB care stratified by patient and diagnostic delay.**

| Catastrophic health expenditure | Patient delay |      | Diagnostic delay |      | All<br>(n=1199) |
|---------------------------------|---------------|------|------------------|------|-----------------|
|                                 | Yes           | No   | Yes              | No   |                 |
| Head count (%)                  | 58.0          | 47.0 | 58.3             | 48.6 | 52.8            |
| Mean gap (%)                    | 21.1          | 14.6 | 19.3             | 17.2 | 18.1            |
| Mean positive gap (%)           | 36.5          | 31.1 | 33.0             | 35.3 | 34.2            |

**Table 4 Single factor analysis of catastrophic health expenditure in patients.**



| Variables               | Experiencing CHE<br>(n,%) | Not<br>experiencing<br>CHE(n,%) | OR (95% CI)        | Chi-square | <i>P-value</i> |
|-------------------------|---------------------------|---------------------------------|--------------------|------------|----------------|
| <b>Patient delay</b>    |                           |                                 |                    |            |                |
| No                      | 265 (47.0)                | 299(53.0)                       | 1.0                |            |                |
| Yes                     | 368(58.0)                 | 267(42.0)                       | 1.555(1.238-1.954) | 14.415     | 0.000          |
| <b>Diagnostic delay</b> |                           |                                 |                    |            |                |
| No                      | 332(48.6)                 | 351(51.4)                       | 1.0                |            |                |
| Yes                     | 301(58.3)                 | 215(41.7)                       | 1.480(1.175-1.864) | 11.153     | 0.001          |
| <b>Sex</b>              |                           |                                 |                    |            |                |
| Female                  | 151(41.9)                 | 209(58.1)                       | 1.0                |            |                |
| Male                    | 482(57.4)                 | 357(42.6)                       | 1.869(1.455-2.400) | 24.300     | 0.000          |

1  
2  
3  
4  
5  
6  
7  
8  
9  
10  
11  
12  
13  
14  
15  
16  
17  
18  
19  
20  
21  
22  
23  
24  
25  
26  
27  
28  
29  
30  
31  
32  
33  
34  
35  
36  
37  
38  
39  
40  
41  
42  
43  
44  
45  
46

**Age**

|       |           |           |                    |        |       |
|-------|-----------|-----------|--------------------|--------|-------|
| ≤40   | 200(37.6) | 332(62.4) | 1.0                |        |       |
| 41-59 | 242(60.2) | 160(39.8) | 2.511(1.925-3.275) | 46.936 | 0.000 |
| ≥60   | 191(72.1) | 74(27.9)  | 4.285(3.109-5.904) | 84.156 | 0.000 |

**Resident status**

|            |           |           |                    |        |       |
|------------|-----------|-----------|--------------------|--------|-------|
| Migrant    | 129(36.8) | 222(63.2) | 1.0                |        |       |
| Inhabitant | 504(59.4) | 344(40.6) | 2.521(1.951-3.259) | 51.246 | 0.000 |

**Marital status**

|                |           |           |                    |        |       |
|----------------|-----------|-----------|--------------------|--------|-------|
| Single         | 133(39.1) | 207(60.9) | 1.0                |        |       |
| Married        | 450(56.7) | 344(43.3) | 2.036(1.571-2.638) | 29.377 | 0.000 |
| Divorced/widow | 50(76.9)  | 15(23.1)  | 5.188(2.800-9.613) | 31.488 | 0.000 |

**Educational level**

|                       |           |           |                    |         |       |
|-----------------------|-----------|-----------|--------------------|---------|-------|
| Primary or below      | 277(72.5) | 105(27.5) | 1.0                |         |       |
| Junior high           | 190(53.4) | 166(46.6) | 0.434(0.319-0.589) | 29.058  | 0.000 |
| High school and above | 166(36.0) | 295(64.0) | 0.213(0.159-0.286) | 111.600 | 0.000 |

**Occupation**

|            |           |           |                    |        |       |
|------------|-----------|-----------|--------------------|--------|-------|
| Unemployed | 139(46.0) | 163(54.0) | 1.0                |        |       |
| Employed   | 128(39.1) | 199(60.9) | 0.754(0.549-1.036) | 3.044  | 0.081 |
| Peasant    | 261(73.9) | 92(26.1)  | 3.327(2.396-4.519) | 53.331 | 0.000 |
| Student    | 37(38.5)  | 59(61.5)  | 0.735(0.460-1.176) | 1.654  | 0.198 |
| Retiree    | 68(56.2)  | 53(43.8)  | 1.505(0.984-2.300) | 3.577  | 0.059 |

**Family size**

1  
2  
3  
4  
5  
6  
7  
8  
9  
10  
11  
12  
13  
14  
15  
16  
17  
18  
19  
20  
21  
22  
23  
24  
25  
26  
27  
28  
29  
30  
31  
32  
33  
34  
35  
36  
37  
38  
39  
40  
41  
42  
43  
44  
45  
46

|     |           |           |                    |       |       |
|-----|-----------|-----------|--------------------|-------|-------|
| 1~3 | 479(54.0) | 408(46.0) | 1.0                |       |       |
| 4~8 | 154(49.4) | 158(50.6) | 0.830(0.641-1.075) | 1.997 | 0.158 |

**Health insurance status**

|                      |           |           |                    |        |       |
|----------------------|-----------|-----------|--------------------|--------|-------|
| None                 | 47(36.2)  | 83(63.8)  | 1.0                |        |       |
| NCMS                 | 351(64.1) | 197(35.9) | 3.146(2.113-4.685) | 31.853 | 0.000 |
| MIUR                 | 111(48.3) | 119(51.7) | 1.647(1.059-2.561) | 4.910  | 0.027 |
| MIUE                 | 109(43.8) | 140(56.2) | 1.675(0.888-2.128) | 2.042  | 0.153 |
| Other insurance plan | 15(35.7)  | 27(64.3)  | 0.981(0.475-2.027) | 0.003  | 0.959 |

**Hospitalization**

|     |           |           |                    |       |       |
|-----|-----------|-----------|--------------------|-------|-------|
| No  | 517(51.3) | 491(48.7) | 1.0                |       |       |
| Yes | 116(60.7) | 75(39.3)  | 1.469(1.071-2.014) | 5.746 | 0.017 |

**Forms of TB**

|                    |           |           |                    |       |       |
|--------------------|-----------|-----------|--------------------|-------|-------|
| Smear-negative PTB | 480(53.8) | 412(46.2) | 1.0                |       |       |
| Smear-positive PTB | 153(49.8) | 154(50.2) | 0.853(0.658-1.105) | 1.448 | 0.229 |

Note: PTB, pulmonary tuberculosis. OR, odds ratio. 95% CI, 95% confidence interval for the odds ratio.

NCMS, New Cooperative Medical Scheme; MIUR, Medical Insurance for Urban Residents; MIUE, Medical Insurance for Urban Employees.

**Table 5 Independent determinants of CHE for TB care using a logistic regression model.**

| Variables                             | $\beta$ | Standard error | Wald   | <i>P</i> -value | OR(95% CI)         |
|---------------------------------------|---------|----------------|--------|-----------------|--------------------|
| Patient delay (Ref: Without delay)    | 0.294   | 0.128          | 5.251  | 0.022           | 1.342(1.043-1.726) |
| Diagnostic delay (Ref: Without delay) | 0.431   | 0.129          | 11.145 | 0.001           | 1.540(1.195-1.983) |

|    |                                           |        |       |       |       |                    |
|----|-------------------------------------------|--------|-------|-------|-------|--------------------|
| 1  |                                           |        |       |       |       |                    |
| 2  |                                           |        |       |       |       |                    |
| 3  |                                           |        |       |       |       |                    |
| 4  |                                           |        |       |       |       |                    |
| 5  | Sex (Ref: Female)                         | 0.347  | 0.144 | 5.764 | 0.016 | 1.141(1.066-1.877) |
| 6  |                                           |        |       |       |       |                    |
| 7  |                                           |        |       |       |       |                    |
| 8  | Age (Ref: ≤40 )                           |        |       | 8.557 | 0.014 |                    |
| 9  |                                           |        |       |       |       |                    |
| 10 |                                           |        |       |       |       |                    |
| 11 | 41-59                                     | 0.336  | 0.187 | 3.216 | 0.073 | 1.399(0.969-2.019) |
| 12 |                                           |        |       |       |       |                    |
| 13 |                                           |        |       |       |       |                    |
| 14 | ≥60                                       | 0.75   | 0.256 | 8.554 | 0.003 | 2.117(1.281-3.498) |
| 15 |                                           |        |       |       |       |                    |
| 16 |                                           |        |       |       |       |                    |
| 17 | Resident status (Ref: Migrant)            | 0.375  | 0.15  | 6.247 | 0.012 | 1.455(1.084-1.951) |
| 18 |                                           |        |       |       |       |                    |
| 19 |                                           |        |       |       |       |                    |
| 20 | Marital status (Ref: Single)              |        |       | 6.239 | 0.044 |                    |
| 21 |                                           |        |       |       |       |                    |
| 22 | Married                                   | -0.005 | 0.192 | 0.001 | 0.977 | 0.995(0.683-1.448) |
| 23 |                                           |        |       |       |       |                    |
| 24 |                                           |        |       |       |       |                    |
| 25 | Divorced/widow                            | 0.794  | 0.36  | 4.87  | 0.027 | 2.211(1.093-4.475) |
| 26 |                                           |        |       |       |       |                    |
| 27 |                                           |        |       |       |       |                    |
| 28 | Educational level (Ref: Primary or below) |        |       | 8.224 | 0.016 |                    |
| 29 |                                           |        |       |       |       |                    |
| 30 |                                           |        |       |       |       |                    |
| 31 | Junior high                               | -0.294 | 0.187 | 2.485 | 0.115 | 0.745(0.517-1.074) |
| 32 |                                           |        |       |       |       |                    |
| 33 |                                           |        |       |       |       |                    |
| 34 | High school and above                     | -0.612 | 0.215 | 8.114 | 0.004 | 0.542(0.356-0.826) |
| 35 |                                           |        |       |       |       |                    |
| 36 |                                           |        |       |       |       |                    |
| 37 |                                           |        |       |       |       |                    |
| 38 |                                           |        |       |       |       |                    |
| 39 |                                           |        |       |       |       |                    |
| 40 |                                           |        |       |       |       |                    |
| 41 |                                           |        |       |       |       |                    |
| 42 |                                           |        |       |       |       |                    |
| 43 |                                           |        |       |       |       |                    |
| 44 |                                           |        |       |       |       |                    |
| 45 |                                           |        |       |       |       |                    |
| 46 |                                           |        |       |       |       |                    |

|    |                                            |        |       |        |       |                    |
|----|--------------------------------------------|--------|-------|--------|-------|--------------------|
| 1  |                                            |        |       |        |       |                    |
| 2  |                                            |        |       |        |       |                    |
| 3  |                                            |        |       |        |       |                    |
| 4  |                                            |        |       |        |       |                    |
| 5  | Occupation (Ref: Unemployed)               |        |       | 28.975 | 0.000 |                    |
| 6  |                                            |        |       |        |       |                    |
| 7  |                                            |        |       |        |       |                    |
| 8  | Employed                                   | 0.025  | 0.176 | 0.02   | 0.887 | 1.025(0.726-1.448) |
| 9  |                                            |        |       |        |       |                    |
| 10 |                                            |        |       |        |       |                    |
| 11 | Peasant                                    | 0.791  | 0.189 | 17.475 | 0.000 | 2.205(1.522-3.194) |
| 12 |                                            |        |       |        |       |                    |
| 13 |                                            |        |       |        |       |                    |
| 14 | Student                                    | 0.368  | 0.279 | 1.745  | 0.187 | 1.446(0.837-2.497) |
| 15 |                                            |        |       |        |       |                    |
| 16 |                                            |        |       |        |       |                    |
| 17 | Retiree                                    | -0.318 | 0.257 | 1.53   | 0.216 | 0.727(0.439-1.204) |
| 18 |                                            |        |       |        |       |                    |
| 19 |                                            |        |       |        |       |                    |
| 20 | <b>Health insurance (Ref: none)</b>        |        |       | 6.355  | 0.174 |                    |
| 21 |                                            |        |       |        |       |                    |
| 22 |                                            |        |       |        |       |                    |
| 23 | NCMS                                       | 0.524  | 0.232 | 5.087  | 0.024 | 1.688(1.071-2.661) |
| 24 |                                            |        |       |        |       |                    |
| 25 |                                            |        |       |        |       |                    |
| 26 | MIUR                                       | 0.358  | 0.248 | 2.085  | 0.149 | 1.431(0.880-2.327) |
| 27 |                                            |        |       |        |       |                    |
| 28 |                                            |        |       |        |       |                    |
| 29 | MIUE                                       | 0.158  | 0.266 | 0.353  | 0.553 | 1.171(0.695-1.974) |
| 30 |                                            |        |       |        |       |                    |
| 31 | Other insurance plan                       | 0.169  | 0.398 | 0.181  | 0.671 | 1.184(0.543-2.583) |
| 32 |                                            |        |       |        |       |                    |
| 33 |                                            |        |       |        |       |                    |
| 34 | Hospitalization (Ref: not hospitalization) | 0.294  | 0.176 | 2.784  | 0.095 | 1.342(0.950-1.897) |
| 35 |                                            |        |       |        |       |                    |
| 36 |                                            |        |       |        |       |                    |

Note: The variables that showed association with CHE ( $p < 0.05$ ) in the univariate analysis were included in the multivariate model. OR, odds ratio. 95% CI, 95%

1  
2  
3  
4  
5  
6  
7  
8  
9  
10  
11  
12  
13  
14  
15  
16  
17  
18  
19  
20  
21  
22  
23  
24  
25  
26  
27  
28  
29  
30  
31  
32  
33  
34  
35  
36  
37  
38  
39  
40  
41  
42  
43  
44  
45  
46

confidence interval for the odds ratio. Ref, reference group.

NCMS, New Cooperative Medical Scheme; MIUR, Medical Insurance for Urban Residents; MIUE, Medical Insurance for Urban Employees.

For peer review only



1  
2  
3  
4  
5  
6  
7  
8  
9  
10  
11  
12  
13  
14  
15  
16  
17  
18  
19  
20  
21  
22  
23  
24  
25  
26  
27  
28  
29  
30  
31  
32  
33  
34  
35  
36  
37  
38  
39  
40  
41  
42  
43  
44  
45  
46  
47  
48  
49  
50  
51  
52  
53  
54  
55  
56  
57  
58  
59  
60

For peer review only

1  
2  
3  
4  
5  
6  
7  
8  
9  
10  
11  
12  
13  
14  
15  
16  
17  
18  
19  
20  
21  
22  
23  
24  
25  
26  
27  
28  
29  
30  
31  
32  
33  
34  
35  
36  
37  
38  
39  
40  
41  
42  
43  
44  
45  
46

**STROBE 2007 (v4) Statement—Checklist of items that should be included in reports of *cross-sectional studies***

| Section/Topic                | Item # | Recommendation                                                                                                                                                                       | Reported on page #                    |
|------------------------------|--------|--------------------------------------------------------------------------------------------------------------------------------------------------------------------------------------|---------------------------------------|
| Title and abstract           | 1      | (a) Indicate the study's design with a commonly used term in the title or the abstract                                                                                               | Page 1-2                              |
|                              |        | (b) Provide in the abstract an informative and balanced summary of what was done and what was found                                                                                  | Page 2-3                              |
| <b>Introduction</b>          |        |                                                                                                                                                                                      |                                       |
| Background/rationale         | 2      | Explain the scientific background and rationale for the investigation being reported                                                                                                 | Page 4-6                              |
| Objectives                   | 3      | State specific objectives, including any prespecified hypotheses                                                                                                                     | Page 6 line 38-54                     |
| <b>Methods</b>               |        |                                                                                                                                                                                      |                                       |
| Study design                 | 4      | Present key elements of study design early in the paper                                                                                                                              | Page 7 line 9-11                      |
| Setting                      | 5      | Describe the setting, locations, and relevant dates, including periods of recruitment, exposure, follow-up, and data collection                                                      | Page 7 line 9-41                      |
| Participants                 | 6      | (a) Give the eligibility criteria, and the sources and methods of selection of participants                                                                                          | Page 7 line 43-59                     |
| Variables                    | 7      | Clearly define all outcomes, exposures, predictors, potential confounders, and effect modifiers. Give diagnostic criteria, if applicable                                             | Page 8 line 49-58<br>Page 9 line 3-58 |
| Data sources/<br>measurement | 8*     | For each variable of interest, give sources of data and details of methods of assessment (measurement). Describe comparability of assessment methods if there is more than one group | Page 8-9                              |

|                        |     |                                                                                                                                                                                                   |                                  |
|------------------------|-----|---------------------------------------------------------------------------------------------------------------------------------------------------------------------------------------------------|----------------------------------|
| Bias                   | 9   | Describe any efforts to address potential sources of bias                                                                                                                                         | Page 8 line 11-46                |
| Study size             | 10  | Explain how the study size was arrived at                                                                                                                                                         | Page 7 line 43-59                |
| Quantitative variables | 11  | Explain how quantitative variables were handled in the analyses. If applicable, describe which groupings were chosen and why                                                                      | Page 9-10                        |
| Statistical methods    | 12  | (a) Describe all statistical methods, including those used to control for confounding                                                                                                             | Page 10 line 6-26                |
|                        |     | (b) Describe any methods used to examine subgroups and interactions                                                                                                                               | Page 10 line 6-26                |
|                        |     | (c) Explain how missing data were addressed                                                                                                                                                       | No missing data                  |
|                        |     | (d) If applicable, describe analytical methods taking account of sampling strategy                                                                                                                | None                             |
|                        |     | (e) Describe any sensitivity analyses                                                                                                                                                             | None                             |
| <b>Results</b>         |     |                                                                                                                                                                                                   |                                  |
| Participants           | 13* | (a) Report numbers of individuals at each stage of study—eg numbers potentially eligible, examined for eligibility, confirmed eligible, included in the study, completing follow-up, and analysed | Page 7 line 43-60                |
|                        |     | (b) Give reasons for non-participation at each stage                                                                                                                                              | Page 7 line 55-60                |
|                        |     | (c) Consider use of a flow diagram                                                                                                                                                                | None                             |
| Descriptive data       | 14* | (a) Give characteristics of study participants (eg demographic, clinical, social) and information on exposures and potential confounders                                                          | Table 1<br>Page 11               |
|                        |     | (b) Indicate number of participants with missing data for each variable of interest                                                                                                               | No participant with missing data |
| Outcome data           | 15* | Report numbers of outcome events or summary measures                                                                                                                                              | Table 2-5                        |
| Main results           | 16  | (a) Give unadjusted estimates and, if applicable, confounder-adjusted estimates and their precision (eg, 95% confidence                                                                           | Table 4 and 5                    |

|                          |    |                                                                                                                                                                            |                    |
|--------------------------|----|----------------------------------------------------------------------------------------------------------------------------------------------------------------------------|--------------------|
|                          |    | interval). Make clear which confounders were adjusted for and why they were included                                                                                       | Page 12 line 18-47 |
|                          |    | (b) Report category boundaries when continuous variables were categorized                                                                                                  | Table 4 and 5      |
|                          |    | (c) If relevant, consider translating estimates of relative risk into absolute risk for a meaningful time period                                                           | Table 5            |
| Other analyses           | 17 | Report other analyses done—eg analyses of subgroups and interactions, and sensitivity analyses                                                                             | None               |
| <b>Discussion</b>        |    |                                                                                                                                                                            |                    |
| Key results              | 18 | Summarise key results with reference to study objectives                                                                                                                   | Page 17 line4-25   |
| Limitations              | 19 | Discuss limitations of the study, taking into account sources of potential bias or imprecision. Discuss both direction and magnitude of any potential bias                 | Page 16 line 30-57 |
| Interpretation           | 20 | Give a cautious overall interpretation of results considering objectives, limitations, multiplicity of analyses, results from similar studies, and other relevant evidence | Page 13-16         |
| Generalisability         | 21 | Discuss the generalisability (external validity) of the study results                                                                                                      | Page 13-17         |
| <b>Other information</b> |    |                                                                                                                                                                            |                    |
| Funding                  | 22 | Give the source of funding and the role of the funders for the present study and, if applicable, for the original study on which the present article is based              | Page 17 line 51-54 |

\*Give information separately for cases and controls in case-control studies and, if applicable, for exposed and unexposed groups in cohort and cross-sectional studies.

**Note:** An Explanation and Elaboration article discusses each checklist item and gives methodological background and published examples of transparent reporting. The STROBE checklist is best used in conjunction with this article (freely available on the Web sites of PLoS Medicine at <http://www.plosmedicine.org/>, Annals of Internal Medicine at <http://www.annals.org/>, and Epidemiology at <http://www.epidem.com/>). Information on the STROBE Initiative is available at [www.strobe-statement.org](http://www.strobe-statement.org).
